# Supplementary material for: Response of Methicillin-Resistant Staphylococcus aureus to Amicoumacin A
Source: PubMed Central journal article supplement (PMC3316591; doi:10.1371/journal.pone.0034037), 2012-03-30

| S. aureus COL Locus | Gene | t0 v t10 <sup>1</sup> | t0 v t40 <sup>1</sup> | t10 v t40 <sup>1</sup> | expr. <sup>2</sup> | SigB <sup>3</sup> | linoleic acid <sup>4</sup> | functional gene annotation                                         | cellular role category                                                                                                    |
|---------------------|------|-----------------------|-----------------------|------------------------|--------------------|-------------------|----------------------------|--------------------------------------------------------------------|---------------------------------------------------------------------------------------------------------------------------|
| SACOL0247           | IrgA | 8.64                  | -1.04                 | -8.99                  | C1                 |                   | ↓                          | holin-like protein IrgA                                            | Cell envelope: Biosynthesis and degradation of murein sacculus and peptidoglycan                                          |
| SACOL0248           | IrgB | 14.03                 | 1.45                  | -9.69                  | C1                 |                   |                            | IrgB protein                                                       | Cell envelope: Biosynthesis and degradation of murein sacculus and peptidoglycan                                          |
| SACOL0740           | -    | 2.65                  | -1.24                 | -3.30                  | C1                 | ☉                 | ↑                          | decarboxylase family protein                                       | Unknown function: Enzymes of unknown specificity                                                                          |
| SACOL0741           | -    | 3.19                  | 1.30                  | -2.45                  | C1                 | ☉                 | ↑                          | conserved hypothetical protein                                     | Hypothetical proteins: Conserved                                                                                          |
| SACOL0742           | -    | 3.43                  | 1.29                  | -2.66                  | C1                 | ☉                 |                            | conserved hypothetical protein                                     | Hypothetical proteins: Conserved                                                                                          |
| SACOL0866           | -    | 5.43                  | 1.98                  | -2.74                  | C1                 |                   |                            | hypothetical protein                                               | -                                                                                                                         |
| SACOL1074           | purK | 2.31                  | -1.34                 | -3.09                  | C1                 |                   |                            | phosphoribosylaminoimidazole carboxylase, ATPase subunit           | Purines, pyrimidines, nucleosides, and nucleotides: Purine ribonucleotide biosynthesis                                    |
| SACOL1076           | purS | 2.22                  | -1.13                 | -2.50                  | C1                 |                   |                            | phosphoribosylformylglycinamide synthase, PurS protein             | Purines, pyrimidines, nucleosides, and nucleotides: Purine ribonucleotide biosynthesis                                    |
| SACOL1077           | purQ | 2.54                  | -1.86                 | -4.71                  | C1                 |                   |                            | phosphoribosylformylglycinamide synthase I                         | Purines, pyrimidines, nucleosides, and nucleotides: Purine ribonucleotide biosynthesis                                    |
| SACOL1078           | purL | 2.10                  | -1.62                 | -3.41                  | C1                 |                   |                            | phosphoribosylformylglycinamide synthase II                        | Purines, pyrimidines, nucleosides, and nucleotides: Purine ribonucleotide biosynthesis                                    |
| SACOL1080           | purM | 3.11                  | 1.47                  | -2.12                  | C1                 |                   |                            | phosphoribosylformylglycinamide cyclo-ligase                       | Purines, pyrimidines, nucleosides, and nucleotides: Purine ribonucleotide biosynthesis                                    |
| SACOL1090           | -    | 2.35                  | -1.47                 | -3.45                  | C1                 | ☉                 | ↑                          | conserved hypothetical protein                                     | Hypothetical proteins: Conserved                                                                                          |
| SACOL1226           | -    | 2.86                  | -1.06                 | -3.03                  | C1                 |                   |                            | conserved hypothetical protein                                     | Hypothetical proteins: Conserved                                                                                          |
| SACOL1236           | -    | 1.79                  | -1.54                 | -2.76                  | C1                 |                   |                            | thiamine pyrophosphokinase                                         | Biosynthesis of cofactors, prosthetic groups, and carriers: Thiamine                                                      |
| SACOL1373           | -    | 3.75                  | 1.47                  | -2.55                  | C1                 |                   |                            | conserved hypothetical protein                                     | Hypothetical proteins: Conserved                                                                                          |
| SACOL1398           | -    | 1.89                  | -1.41                 | -2.67                  | C1                 |                   |                            | transcriptional regulator, putative                                | Regulatory functions: Other                                                                                               |
| SACOL1602           | -    | 2.25                  | -1.61                 | -3.63                  | C1                 |                   | ↑                          | metallo-beta-lactamase family protein                              | Unknown function: Enzymes of unknown specificity                                                                          |
| SACOL1647           | -    | 1.96                  | -1.46                 | -2.86                  | C1                 |                   |                            | conserved hypothetical protein                                     | Hypothetical proteins: Conserved                                                                                          |
| SACOL1735           | coaE | 2.09                  | -1.41                 | -2.95                  | C1                 |                   |                            | dephospho-CoA kinase                                               | Biosynthesis of cofactors, prosthetic groups, and carriers: Pantothenate and coenzyme A                                   |
| SACOL1745           | pyk  | 2.67                  | -1.66                 | -4.42                  | C1                 |                   |                            | pyruvate kinase                                                    | Energy metabolism: Glycolysis/gluconeogenesis                                                                             |
| SACOL1789           | -    | 2.23                  | -1.34                 | -3.00                  | C1                 | ☉                 |                            | conserved hypothetical protein                                     | Hypothetical proteins: Conserved                                                                                          |
| SACOL1895           | -    | 3.11                  | 1.17                  | -2.66                  | C1                 |                   |                            | conserved hypothetical protein                                     | Hypothetical proteins: Conserved                                                                                          |
| SACOL1897           | -    | 2.39                  | -1.06                 | -2.55                  | C1                 |                   |                            | protein export protein PrsA, putative                              | Protein fate: Protein and peptide secretion and trafficking                                                               |
| SACOL1898           | cbf1 | 2.51                  | 1.19                  | -2.11                  | C1                 |                   |                            | cmp-binding factor 1                                               | Mobile and extrachromosomal element functions: Plasmid functions                                                          |
| SACOL1912           | -    | 2.65                  | 1.45                  | -1.82                  | C1                 | ☉                 |                            | glucosamine-6-phosphate isomerase, putative                        | Central intermediary metabolism: Amino sugars                                                                             |
| SACOL1933           | -    | 4.68                  | 1.76                  | -2.66                  | C1                 | ☉                 | ↑                          | Thu/PrpI family protein                                            | Unknown function: General                                                                                                 |
| SACOL1934           | -    | 3.37                  | 1.50                  | -2.24                  | C1                 | ☉                 |                            | conserved hypothetical protein                                     | Hypothetical proteins: Conserved                                                                                          |
| SACOL1941           | yihY | 2.95                  | -1.13                 | -3.34                  | C1                 | ☉                 |                            | YihY family protein                                                | Unknown function: General                                                                                                 |
| SACOL2091           | fabZ | 4.02                  | -1.02                 | -4.08                  | C1                 | ☉                 | ↑                          | beta-hydroxyacyl-(acyl-carrier-protein) dehydratase FabZ           | Fatty acid and phospholipid metabolism: Biosynthesis                                                                      |
| SACOL2132           | -    | 2.50                  | 1.46                  | -1.71                  | C1                 | ☉                 |                            | conserved hypothetical protein                                     | Hypothetical proteins: Conserved                                                                                          |
| SACOL2136           | -    | 4.11                  | 1.38                  | -2.97                  | C1                 | ☉                 | ↑                          | conserved hypothetical protein                                     | Hypothetical proteins: Conserved                                                                                          |
| SACOL2174           | -    | 5.38                  | 1.74                  | -3.09                  | C1                 | ☉                 | ↑                          | conserved hypothetical protein                                     | Hypothetical proteins: Conserved                                                                                          |
| SACOL2175           | -    | 5.70                  | 1.29                  | -4.41                  | C1                 | ☉                 | ↑                          | conserved hypothetical protein                                     | Hypothetical proteins: Conserved                                                                                          |
| SACOL2242           | -    | 2.32                  | -1.10                 | -2.55                  | C1                 |                   |                            | xanthine/uracil permease family protein                            | Transport and binding proteins: Nucleosides, purines and pyrimidines                                                      |
| SACOL2300           | -    | 3.13                  | 1.09                  | -2.87                  | C1                 | ☉                 | ↑                          | conserved hypothetical protein                                     | Hypothetical proteins: Conserved                                                                                          |
| SACOL2301           | -    | 3.45                  | 1.47                  | -2.35                  | C1                 | ☉                 | ↑                          | formate dehydrogenase, alpha subunit, putative                     | Energy metabolism: Anaerobic                                                                                              |
| SACOL2302           | -    | 2.51                  | -1.19                 | -2.98                  | C1                 | ☉                 | ↑                          | transcriptional regulator, putative                                | Regulatory functions: Other                                                                                               |
| SACOL2321           | -    | 3.42                  | 1.58                  | -2.16                  | C1                 | ☉                 | ↑                          | oxidoreductase, short chain dehydrogenase/reductase family         | Unknown function: Enzymes of unknown specificity                                                                          |
| SACOL2327           | hutG | 2.57                  | -1.06                 | -2.74                  | C1                 | ☉                 | ↑                          | formiminoglutamate                                                 | Energy metabolism: Amino acids and amines                                                                                 |
| SACOL2329           | rpiA | 2.76                  | -1.40                 | -3.86                  | C1                 |                   |                            | ribose 5-phosphate isomerase                                       | Energy metabolism: Pentose phosphate pathway                                                                              |
| SACOL2379           | -    | 3.36                  | 1.32                  | -2.55                  | C1                 | ☉                 | ↑                          | conserved hypothetical protein                                     | Hypothetical proteins: Conserved                                                                                          |
| SACOL2394           | narH | 3.26                  | 1.20                  | -2.73                  | C1                 |                   | ↑                          | respiratory nitrate reductase, beta subunit                        | Energy metabolism: Anaerobic; Energy metabolism: Electron transport; Central intermediary metabolism: Nitrogen metabolism |
| SACOL2395           | narG | 3.49                  | 1.17                  | -2.98                  | C1                 |                   | ↑                          | respiratory nitrate reductase, alpha subunit                       | Energy metabolism: Anaerobic; Energy metabolism: Electron transport; Central intermediary metabolism: Nitrogen metabolism |
| SACOL2563           | clpL | 2.53                  | 1.08                  | -2.34                  | C1                 | ☉                 | ↑                          | ATP-dependent Clp protease, putative                               | Protein fate: Degradation of proteins, peptides, and glycopeptides                                                        |
| SACOL2578           | -    | 1.88                  | -1.37                 | -2.59                  | C1                 | ☉                 | ↑                          | glycosyl transferase, group 2 family protein                       | Cell envelope: Biosynthesis and degradation of surface polysaccharides and lipopolysaccharides                            |
| SACOL2596           | -    | 2.89                  | 1.14                  | -2.53                  | C1                 | ☉                 | ↑                          | conserved hypothetical protein                                     | Hypothetical proteins: Conserved                                                                                          |
| SACOL2597           | -    | 3.50                  | 1.39                  | -2.52                  | C1                 | ☉                 | ↑                          | hydrolase, alpha/beta hydrolase fold family                        | Unknown function: Enzymes of unknown specificity                                                                          |
| SACOL2609           | -    | 2.31                  | -1.79                 | -4.14                  | C1                 | ☉                 | ↑                          | conserved hypothetical protein                                     | Hypothetical proteins: Conserved                                                                                          |
| SACOL2621           | -    | 2.94                  | 1.03                  | -2.86                  | C1                 |                   |                            | hypothetical protein                                               | -                                                                                                                         |
| SACOL2625           | -    | 3.33                  | 1.18                  | -2.83                  | C1                 | ☉                 | ↑                          | conserved hypothetical protein                                     | Hypothetical proteins: Conserved                                                                                          |
| SACOL2681           | -    | 2.90                  | 1.54                  | -1.88                  | C1                 | ☉                 | ↑                          | conserved hypothetical protein                                     | Hypothetical proteins: Conserved                                                                                          |
| SACOL2717           | -    | 2.83                  | -1.21                 | -3.42                  | C1                 |                   |                            | hypothetical protein                                               | -                                                                                                                         |
| SACOL0012           | -    | 1.06                  | 2.84                  | 2.69                   | C2                 |                   |                            | homoserine O-acetyltransferase, putative                           | Amino acid biosynthesis: Aspartate family                                                                                 |
| SACOL0184           | -    | 1.25                  | 4.03                  | 3.23                   | C2                 |                   |                            | peptide ABC transporter, ATP-binding protein                       | Transport and binding proteins: Amino acids, peptides and amines                                                          |
| SACOL0263           | lytM | 1.12                  | 3.86                  | 3.43                   | C2                 |                   |                            | peptidoglycan hydrolase                                            | Cell envelope: Biosynthesis and degradation of murein sacculus and peptidoglycan                                          |
| SACOL0428           | metE | 1.18                  | 2.80                  | 2.38                   | C2                 |                   |                            | 5-methyltetrahydropteroyltryptophan-homocysteine methyltransferase | Amino acid biosynthesis: Aspartate family                                                                                 |
| SACOL0504           | -    | -1.19                 | 4.44                  | 5.29                   | C2                 |                   |                            | ABC transporter, ATP-binding protein                               | Transport and binding proteins: Unknown substrate                                                                         |
| SACOL0505           | -    | 1.33                  | 6.67                  | 5.00                   | C2                 |                   |                            | ABC transporter, permease protein                                  | Transport and binding proteins: Unknown substrate                                                                         |
| SACOL0514           | gltB | -1.03                 | 3.48                  | 3.57                   | C2                 |                   |                            | glutamate synthase, large subunit                                  | Amino acid biosynthesis: Glutamate family                                                                                 |
| SACOL0515           | gltD | 1.21                  | 3.87                  | 3.19                   | C2                 |                   |                            | glutamate synthase, small subunit                                  | Amino acid biosynthesis: Glutamate family                                                                                 |
| SACOL0517           | treC | 1.18                  | 3.23                  | 2.74                   | C2                 |                   |                            | alpha,alpha-phosphotrehalase                                       | Energy metabolism: Biosynthesis and degradation of polysaccharides                                                        |
| SACOL0641           | -    | 1.11                  | 2.62                  | 2.37                   | C2                 |                   | ↑                          | conserved hypothetical protein                                     | Hypothetical proteins: Conserved                                                                                          |
| SACOL0712           | -    | -1.16                 | 3.11                  | 3.60                   | C2                 |                   |                            | lipase/esterase                                                    | Fatty acid and phospholipid metabolism: Degradation                                                                       |
| SACOL0770           | -    | 1.21                  | 4.81                  | 3.96                   | C2                 |                   |                            | radical activating enzyme family protein                           | Unknown function: Enzymes of unknown specificity                                                                          |
| SACOL0771           | -    | 1.30                  | 5.31                  | 4.09                   | C2                 |                   | ↑                          | 6-pyruvoyl tetrahydrobiopterin synthase, putative                  | Biosynthesis of cofactors, prosthetic groups, and carriers: Other                                                         |
| SACOL0772           | -    | 1.01                  | 4.29                  | 4.25                   | C2                 |                   |                            | exsB protein                                                       | Unknown function: General                                                                                                 |
| SACOL0802           | -    | -1.17                 | 3.77                  | 4.43                   | C2                 |                   | ↓                          | conserved hypothetical protein                                     | Hypothetical proteins: Conserved                                                                                          |
| SACOL0813           | -    | 1.26                  | 3.07                  | 2.43                   | C2                 |                   |                            | comF operon protein 1, putative                                    | Cellular processes: DNA transformation                                                                                    |
| SACOL0845           | est  | 1.26                  | 3.31                  | 2.63                   | C2                 |                   |                            | carboxylesterase                                                   | Cellular processes: Detoxification; Fatty acid and phospholipid metabolism: Degradation                                   |
| SACOL0870           | -    | 1.20                  | 2.66                  | 2.22                   | C2                 |                   |                            | LysE/YgaA family protein                                           | Unknown function: General                                                                                                 |
| SACOL0882           | -    | -1.21                 | 4.53                  | 5.49                   | C2                 |                   |                            | ABC transporter, ATP-binding protein                               | Transport and binding proteins: Unknown substrate                                                                         |
| SACOL0883           | -    | -1.06                 | 5.19                  | 5.50                   | C2                 |                   |                            | ABC transporter, permease protein                                  | Transport and binding proteins: Unknown substrate                                                                         |
| SACOL0884           | -    | 1.10                  | 4.39                  | 3.98                   | C2                 |                   |                            | ABC transporter, substrate-binding protein                         | Transport and binding proteins: Unknown substrate                                                                         |
| SACOL1032           | -    | -1.15                 | 3.87                  | 4.44                   | C2                 |                   |                            | ComK family protein                                                | Unknown function: General                                                                                                 |
| SACOL1268           | gid  | 1.09                  | 2.60                  | 2.39                   | C2                 |                   | ↑                          | Gid protein                                                        | Unknown function: General                                                                                                 |
| SACOL1375           | -    | 1.18                  | 3.67                  | 3.11                   | C2                 |                   |                            | conserved hypothetical protein                                     | Hypothetical proteins: Conserved                                                                                          |
| SACOL1414           | -    | 1.19                  | 3.08                  | 2.59                   | C2                 |                   |                            | peptide ABC transporter, ATP-binding protein                       | Transport and binding proteins: Amino acids, peptides and amines                                                          |
| SACOL1415           | -    | 1.09                  | 3.06                  | 2.80                   | C2                 |                   |                            | peptide ABC transporter, ATP-binding protein                       | Transport and binding proteins: Amino acids, peptides and amines                                                          |
| SACOL1416           | -    | 1.00                  | 4.13                  | 4.12                   | C2                 |                   |                            | peptide ABC transporter, permease protein, putative                | Transport and binding proteins: Amino acids, peptides and amines                                                          |
| SACOL1417           | -    | 1.26                  | 5.78                  | 4.60                   | C2                 |                   |                            | peptide ABC transporter, permease protein                          | Transport and binding proteins: Amino acids, peptides and amines                                                          |
| SACOL1442           | -    | 1.14                  | 2.66                  | 2.33                   | C2                 |                   |                            | peptide ABC transporter, permease protein                          | Transport and binding proteins: Amino acids, peptides and amines                                                          |
| SACOL1468           | -    | 1.24                  | 2.89                  | 2.33                   | C2                 |                   |                            | IS1272-related, transposase, degenerate                            | Mobile and extrachromosomal element functions: Transposon functions; Disrupted reading frame                              |
| SACOL1490           | pbp2 | 1.17                  | 2.59                  | 2.21                   | C2                 |                   |                            | membrane protein, putative                                         | Cell envelope: Other                                                                                                      |
| SACOL1541           | -    | 1.34                  | 4.01                  | 3.00                   | C2                 |                   | ↓                          | penicillin-binding protein 2                                       | Cell envelope: Biosynthesis and degradation of murein sacculus and peptidoglycan                                          |
| SACOL1724           | -    | 1.14                  | 3.14                  | 2.75                   | C2                 |                   |                            | transcriptional regulator, Fur family                              | Transport and binding proteins: Cations and iron carrying compounds; Regulatory functions: DNA interactions               |
|                     |      |                       |                       |                        |                    |                   |                            | MutT/nudix family protein                                          | DNA metabolism: DNA replication, recombination, and repair                                                                |

|           |       |             |              |              |    |                                                            |                                                                                                                                                                            |
|-----------|-------|-------------|--------------|--------------|----|------------------------------------------------------------|----------------------------------------------------------------------------------------------------------------------------------------------------------------------------|
| SACOL1830 | -     | -1.13       | <b>2.41</b>  | <b>2.73</b>  | C2 | abortive infection protein family                          | Unknown function: General                                                                                                                                                  |
| SACOL1870 | -     | 1.02        | <b>3.18</b>  | <b>3.12</b>  | C2 | hypothetical protein                                       | -                                                                                                                                                                          |
| SACOL1880 | lukD  | 1.15        | <b>2.78</b>  | <b>2.42</b>  | C2 | leukotoxin LukD                                            | Cellular processes: Toxin production and resistance; Cellular processes: Pathogenesis                                                                                      |
| SACOL1881 | lukE  | -1.17       | <b>2.82</b>  | <b>3.29</b>  | C2 | leukotoxin LukE                                            | Cellular processes: Toxin production and resistance; Cellular processes: Pathogenesis                                                                                      |
| SACOL1954 | -     | 1.07        | <b>3.24</b>  | <b>3.04</b>  | C2 | exonuclease                                                | Unknown function: Enzymes of unknown specificity                                                                                                                           |
| SACOL2020 | -     | -1.05       | <b>3.47</b>  | <b>3.66</b>  | C2 | conserved hypothetical protein                             | Hypothetical proteins: Conserved                                                                                                                                           |
| SACOL2033 | -     | -1.03       | <b>4.20</b>  | <b>4.32</b>  | C2 | conserved hypothetical protein                             | Hypothetical proteins: Conserved                                                                                                                                           |
| SACOL2034 | -     | -1.01       | <b>4.54</b>  | <b>4.60</b>  | C2 | conserved hypothetical protein                             | Hypothetical proteins: Conserved                                                                                                                                           |
| SACOL2066 | kdjC  | 1.24        | <b>3.59</b>  | <b>2.89</b>  | C2 | K <sup>+</sup> -transporting ATPase, C subunit             | Transport and binding proteins: Cations and iron carrying compounds                                                                                                        |
| SACOL2081 | -     | -1.03       | <b>4.59</b>  | <b>4.75</b>  | C2 | hypothetical protein                                       | -                                                                                                                                                                          |
| SACOL2322 | -     | 1.28        | <b>3.49</b>  | <b>2.72</b>  | C2 | peptidase, M20/M25/M40 family                              | Protein fate: Degradation of proteins, peptides, and glycopeptides                                                                                                         |
| SACOL2458 | -     | 1.06        | <b>4.25</b>  | <b>3.99</b>  | C2 | amino acid permease                                        | Transport and binding proteins: Amino acids, peptides and amines                                                                                                           |
| SACOL2466 | -     | 1.16        | <b>5.43</b>  | <b>4.69</b>  | C2 | hypothetical protein                                       | -                                                                                                                                                                          |
| SACOL2483 | -     | <b>1.26</b> | <b>3.07</b>  | <b>2.43</b>  | C2 | transporter, putative                                      | Transport and binding proteins: Unknown substrate                                                                                                                          |
| SACOL2544 | sdaAA | 1.11        | <b>4.00</b>  | <b>3.62</b>  | C2 | L-serine dehydratase, iron-sulfur-dependent, alpha subunit | Energy metabolism: Amino acids and amines                                                                                                                                  |
| SACOL2545 | sdaAB | 1.07        | <b>6.96</b>  | <b>6.53</b>  | C2 | L-serine dehydratase, iron-sulfur-dependent, beta subunit  | Energy metabolism: Amino acids and amines                                                                                                                                  |
| SACOL2546 | -     | 1.06        | <b>6.29</b>  | <b>5.91</b>  | C2 | perfringolysin O regulator protein, putative               | Regulatory functions: Other                                                                                                                                                |
| SACOL2588 | -     | 1.03        | <b>2.90</b>  | <b>2.82</b>  | C2 | hypothetical protein                                       | -                                                                                                                                                                          |
| SACOL2615 | panB  | 1.03        | <b>2.97</b>  | <b>2.88</b>  | C2 | 3-methyl-2-oxobutanoate hydroxymethyltransferase           | Biosynthesis of cofactors, prosthetic groups, and carriers: Pantothenate and coenzyme A                                                                                    |
| SACOL0007 | -     | 1.55        | <b>2.74</b>  | <b>1.76</b>  | C3 | YjeF-related protein                                       | Unknown function: General                                                                                                                                                  |
| SACOL0061 | -     | <b>1.55</b> | <b>2.61</b>  | <b>1.68</b>  | C3 | conserved domain protein                                   | Hypothetical proteins: Domain                                                                                                                                              |
| SACOL0129 | -     | <b>1.36</b> | <b>2.79</b>  | <b>2.05</b>  | C3 | conserved hypothetical protein                             | Hypothetical proteins: Conserved                                                                                                                                           |
| SACOL0178 | -     | 1.78        | <b>2.74</b>  | <b>1.54</b>  | C3 | PTS system, IIBC components                                | Transport and binding proteins: Carbohydrates, organic alcohols, and acids; Signal transduction: PTS                                                                       |
| SACOL0210 | -     | 1.57        | <b>3.08</b>  | <b>1.97</b>  | C3 | hypothetical protein                                       | -                                                                                                                                                                          |
| SACOL0212 | -     | 1.61        | <b>3.13</b>  | <b>1.95</b>  | C3 | 3-hydroxyacyl-CoA dehydrogenase protein                    | Fatty acid and phospholipid metabolism: Degradation                                                                                                                        |
| SACOL0231 | -     | 1.62        | <b>3.27</b>  | <b>2.02</b>  | C3 | hypothetical protein                                       | -                                                                                                                                                                          |
| SACOL0308 | -     | 1.44        | <b>2.71</b>  | <b>1.89</b>  | C3 | carbohydrate kinase, PfkB family                           | Energy metabolism: Sugars                                                                                                                                                  |
| SACOL0309 | -     | <b>1.64</b> | <b>3.82</b>  | <b>2.33</b>  | C3 | conserved hypothetical protein                             | Hypothetical proteins: Conserved                                                                                                                                           |
| SACOL0310 | -     | <b>2.29</b> | <b>4.54</b>  | <b>1.99</b>  | C3 | nucleoside permease NupC, putative                         | Transport and binding proteins: Nucleosides, purines and pyrimidines                                                                                                       |
| SACOL0324 | -     | 1.51        | <b>2.74</b>  | <b>1.81</b>  | C3 | hypothetical protein                                       | -                                                                                                                                                                          |
| SACOL0333 | -     | <b>1.60</b> | <b>2.50</b>  | <b>1.56</b>  | C3 | conserved hypothetical protein                             | Hypothetical proteins: Conserved                                                                                                                                           |
| SACOL0334 | -     | 1.57        | <b>2.56</b>  | <b>1.63</b>  | C3 | conserved hypothetical protein                             | Hypothetical proteins: Conserved                                                                                                                                           |
| SACOL0413 | -     | 1.57        | <b>2.65</b>  | <b>1.68</b>  | C3 | ribosomal-protein-serine acetyltransferase, putative       | Protein synthesis: Ribosomal proteins: synthesis and modification                                                                                                          |
| SACOL0414 | -     | 1.57        | <b>3.53</b>  | <b>2.25</b>  | C3 | lipoprotein, putative                                      | Cell envelope: Other                                                                                                                                                       |
| SACOL0415 | -     | 1.31        | <b>2.75</b>  | <b>2.10</b>  | C3 | Dyp-type peroxidase family protein                         | Unknown function: Enzymes of unknown specificity                                                                                                                           |
| SACOL0442 | -     | 1.64        | <b>2.59</b>  | <b>1.58</b>  | C3 | staphylococcal enterotoxin, putative                       | Cellular processes: Toxin production and resistance                                                                                                                        |
| SACOL0462 | -     | 1.47        | <b>2.62</b>  | <b>1.78</b>  | C3 | hypothetical protein                                       | -                                                                                                                                                                          |
| SACOL0754 | norA  | <b>1.64</b> | <b>3.62</b>  | <b>2.20</b>  | C3 | multi drug resistance protein (norA)                       | Cellular processes: Toxin production and resistance; Transport and binding proteins: Other                                                                                 |
| SACOL0757 | -     | 1.59        | <b>3.79</b>  | <b>2.38</b>  | C3 | transcriptional regulator, DeoR family                     | Regulatory functions: DNA interactions                                                                                                                                     |
| SACOL0758 | fruK  | 1.69        | <b>4.58</b>  | <b>2.70</b>  | C3 | ↓ 1-phosphofruktokinase                                    | Energy metabolism: Glycolysis/gluconeogenesis                                                                                                                              |
| SACOL0804 | -     | 2.05        | <b>3.45</b>  | <b>1.69</b>  | C3 | conserved hypothetical protein                             | Hypothetical proteins: Conserved                                                                                                                                           |
| SACOL0814 | -     | <b>1.43</b> | <b>2.95</b>  | <b>2.06</b>  | C3 | competence protein F                                       | Cellular processes: DNA transformation                                                                                                                                     |
| SACOL0820 | -     | 1.31        | <b>2.68</b>  | <b>2.05</b>  | C3 | LysM domain protein                                        | Unknown function: General                                                                                                                                                  |
| SACOL0846 | -     | 2.07        | <b>4.05</b>  | <b>1.96</b>  | C3 | ↑ exoribonuclease, VacB/RNase II family                    | Transcription: Degradation of RNA                                                                                                                                          |
| SACOL0847 | smfB  | 2.09        | <b>4.17</b>  | <b>2.00</b>  | C3 | ↑ SsrA-binding protein                                     | Protein synthesis: Other                                                                                                                                                   |
| SACOL0855 | -     | <b>1.96</b> | <b>4.32</b>  | <b>2.20</b>  | C3 | ↑ acetyltransferase, GNAT family                           | Unknown function: Enzymes of unknown specificity                                                                                                                           |
| SACOL0865 | -     | 1.68        | <b>2.79</b>  | <b>1.66</b>  | C3 | ↑ hypothetical protein                                     | -                                                                                                                                                                          |
| SACOL0998 | -     | <b>1.51</b> | <b>2.89</b>  | <b>1.91</b>  | C3 | oligopeptide ABC transporter, ATP-binding protein          | Transport and binding proteins: Amino acids, peptides and amines                                                                                                           |
| SACOL1107 | -     | <b>1.81</b> | <b>3.22</b>  | <b>1.78</b>  | C3 | transcriptional regulator, Cro/Ci family                   | Regulatory functions: DNA interactions                                                                                                                                     |
| SACOL1182 | arcC1 | 1.74        | <b>2.62</b>  | <b>1.51</b>  | C3 | ↓ carbamate kinase                                         | Energy metabolism: Amino acids and amines                                                                                                                                  |
| SACOL1238 | rpmB  | 1.66        | <b>2.73</b>  | <b>1.64</b>  | C3 | ribosomal protein L28                                      | Protein synthesis: Ribosomal proteins: synthesis and modification                                                                                                          |
| SACOL1362 | hom   | 1.40        | <b>4.65</b>  | <b>3.32</b>  | C3 | homoserine dehydrogenase                                   | Amino acid biosynthesis: Aspartate family                                                                                                                                  |
| SACOL1363 | thrC  | 1.33        | <b>3.44</b>  | <b>2.59</b>  | C3 | threonine synthase                                         | Amino acid biosynthesis: Aspartate family                                                                                                                                  |
| SACOL1400 | -     | 1.32        | <b>2.94</b>  | <b>2.22</b>  | C3 | ImpB/MucB/Samb family protein                              | DNA metabolism: DNA replication, recombination, and repair                                                                                                                 |
| SACOL1488 | -     | 1.35        | <b>2.88</b>  | <b>2.13</b>  | C3 | hypothetical protein                                       | -                                                                                                                                                                          |
| SACOL1489 | recU  | 1.57        | <b>3.60</b>  | <b>2.29</b>  | C3 | recombination protein U                                    | DNA metabolism: DNA replication, recombination, and repair                                                                                                                 |
| SACOL1525 | fer   | 1.54        | <b>4.66</b>  | <b>3.03</b>  | C3 | ferredoxin                                                 | Energy metabolism: Electron transport                                                                                                                                      |
| SACOL1540 | xerD  | 1.39        | <b>4.28</b>  | <b>3.08</b>  | C3 | tyrosine recombinase XerD                                  | DNA metabolism: DNA replication, recombination, and repair                                                                                                                 |
| SACOL1696 | ruvB  | <b>1.52</b> | <b>2.55</b>  | <b>1.68</b>  | C3 | Holliday junction DNA helicase RuvB                        | DNA metabolism: DNA replication, recombination, and repair                                                                                                                 |
| SACOL1698 | -     | <b>1.96</b> | <b>3.08</b>  | <b>1.57</b>  | C3 | ACT domain protein                                         | Unknown function: General                                                                                                                                                  |
| SACOL1699 | -     | 1.83        | <b>2.82</b>  | <b>1.54</b>  | C3 | GTP-binding protein, GTP1/OBG family                       | Unknown function: General                                                                                                                                                  |
| SACOL1702 | rplU  | 1.70        | <b>2.76</b>  | <b>1.62</b>  | C3 | ribosomal protein L21                                      | Protein synthesis: Ribosomal proteins: synthesis and modification                                                                                                          |
| SACOL1723 | -     | 1.54        | <b>3.28</b>  | <b>2.13</b>  | C3 | conserved hypothetical protein                             | Hypothetical proteins: Conserved                                                                                                                                           |
| SACOL1822 | arsR  | 1.45        | <b>4.93</b>  | <b>3.41</b>  | C3 | arsenical resistance operon repressor                      | Cellular processes: Detoxification; Regulatory functions: DNA interactions                                                                                                 |
| SACOL1823 | arsB  | <b>1.70</b> | <b>4.60</b>  | <b>2.71</b>  | C3 | arsenic pump membrane protein                              | Cellular processes: Detoxification; Transport and binding proteins: Other                                                                                                  |
| SACOL1824 | arsC  | 1.51        | <b>3.27</b>  | <b>2.17</b>  | C3 | arsenate reductase (thioredoxin)                           | Cellular processes: Detoxification                                                                                                                                         |
| SACOL1825 | -     | <b>1.58</b> | <b>2.99</b>  | <b>1.89</b>  | C3 | N-acetylmuramoyl-L-alanine amidase, family 4               | Cell envelope: Biosynthesis and degradation of surface polysaccharides and lipopolysaccharides                                                                             |
| SACOL2088 | sceD  | 2.38        | <b>11.30</b> | <b>4.75</b>  | C3 | ↑ sceD protein, putative                                   | Unknown function: General                                                                                                                                                  |
| SACOL2215 | rpsM  | 1.37        | <b>2.73</b>  | <b>1.99</b>  | C3 | ↑ ribosomal protein S13/S18                                | Protein synthesis: Ribosomal proteins: synthesis and modification                                                                                                          |
| SACOL2256 | -     | <b>1.77</b> | <b>2.78</b>  | <b>1.58</b>  | C3 | transcriptional regulator, MarR family                     | Cellular processes: Toxin production and resistance; Regulatory functions: DNA interactions                                                                                |
| SACOL2291 | -     | 1.59        | <b>3.57</b>  | <b>2.24</b>  | C3 | staphyloxanthin biosynthesis protein                       | Cellular processes: Pathogenesis                                                                                                                                           |
| SACOL2353 | tcaR  | 1.95        | <b>5.71</b>  | <b>2.93</b>  | C3 | ↑ transcriptional regulator TcaR                           | Cell envelope: Biosynthesis and degradation of murein sacculus and peptidoglycan; Toxin production and resistance; Regulatory functions: DNA interactions                  |
| SACOL2416 | -     | 1.28        | <b>2.78</b>  | <b>2.17</b>  | C3 | cation efflux family protein                               | Transport and binding proteins: Cations and iron carrying compounds                                                                                                        |
| SACOL2441 | -     | 1.39        | <b>3.41</b>  | <b>2.44</b>  | C3 | amino acid permease                                        | Transport and binding proteins: Amino acids, peptides and amines                                                                                                           |
| SACOL2464 | -     | <b>2.34</b> | <b>5.64</b>  | <b>2.41</b>  | C3 | addiction module toxin, Txe/YoeB family                    | Cellular processes: Toxin production and resistance; Mobile and extrachromosomal element functions: Other                                                                  |
| SACOL2465 | -     | 2.28        | <b>4.96</b>  | <b>2.17</b>  | C3 | addiction module antitoxin, Axe family                     | Cellular processes: Toxin production and resistance; Mobile and extrachromosomal element functions: Other                                                                  |
| SACOL2614 | panC  | 1.39        | <b>3.09</b>  | <b>2.22</b>  | C3 | pantoate-beta-alanine ligase                               | Biosynthesis of cofactors, prosthetic groups, and carriers: Pantothenate and coenzyme A                                                                                    |
| SACOL2632 | cuoT  | 1.32        | <b>2.85</b>  | <b>2.15</b>  | C3 | osmoprotectant transporter, BCCT family                    | Transport and binding proteins: Amino acids, peptides and amines                                                                                                           |
| SACOL2710 | -     | 1.37        | <b>2.72</b>  | <b>1.99</b>  | C3 | conserved hypothetical protein                             | Hypothetical proteins: Conserved                                                                                                                                           |
| SACOL2713 | -     | <b>2.39</b> | <b>4.93</b>  | <b>2.06</b>  | C3 | rhodanese-like domain protein                              | Unknown function: General                                                                                                                                                  |
| SACOL2714 | pcp   | 1.33        | <b>3.61</b>  | <b>2.72</b>  | C3 | pyrrolidone-carboxylate peptidase                          | Protein fate: Degradation of proteins, peptides, and glycopeptides                                                                                                         |
| SACOL0008 | hutH  | <b>3.87</b> | <b>4.16</b>  | <b>1.08</b>  | C4 | histidine ammonia-lyase                                    | Energy metabolism: Amino acids and amines                                                                                                                                  |
| SACOL0065 | -     | <b>3.41</b> | <b>2.83</b>  | <b>-1.20</b> | C4 | conserved hypothetical protein                             | Hypothetical proteins: Conserved                                                                                                                                           |
| SACOL0073 | -     | <b>2.41</b> | <b>2.59</b>  | <b>1.08</b>  | C4 | conserved hypothetical protein                             | Hypothetical proteins: Conserved                                                                                                                                           |
| SACOL0122 | -     | <b>2.10</b> | <b>2.61</b>  | <b>1.24</b>  | C4 | ↑ tetracycline resistance protein, putative                | Cellular processes: Toxin production and resistance; Transport and binding proteins: Other                                                                                 |
| SACOL0136 | cap5A | <b>3.80</b> | <b>2.67</b>  | <b>-1.43</b> | C4 | ↑ capsular polysaccharide biosynthesis protein Cap5A       | Cell envelope: Biosynthesis and degradation of surface polysaccharides and lipopolysaccharides; Transport and binding proteins: Carbohydrates, organic alcohols, and acids |

|           |       |      |       |       |    |   |                                                    |                                                                                                                               |                                                                                                                                                                  |
|-----------|-------|------|-------|-------|----|---|----------------------------------------------------|-------------------------------------------------------------------------------------------------------------------------------|------------------------------------------------------------------------------------------------------------------------------------------------------------------|
| SACOL0137 | cap5B | 3.01 | 2.30  | -1.31 | C4 | ♂ | capsular polysaccharide biosynthesis protein Cap5B | Cell envelope: Biosynthesis and degradation of surface polysaccharides and lipopolysaccharides                                |                                                                                                                                                                  |
| SACOL0138 | cap5C | 3.37 | 1.99  | -1.69 | C4 | ♂ | capsular polysaccharide biosynthesis protein Cap5C | Cell envelope: Biosynthesis and degradation of surface polysaccharides and lipopolysaccharides                                |                                                                                                                                                                  |
| SACOL0264 | -     | 3.93 | 4.44  | 1.13  | C4 |   | ABC transporter, ATP-binding protein               | Transport and binding proteins: Unknown substrate                                                                             |                                                                                                                                                                  |
| SACOL0265 | -     | 3.13 | 4.97  | 1.59  | C4 |   | hypothetical protein                               | -                                                                                                                             |                                                                                                                                                                  |
| SACOL0317 | -     | 2.37 | 3.79  | 1.60  | C4 |   | lipase precursor, interruption-N                   | Fatty acid and phospholipid metabolism: Degradation; Disrupted reading frame                                                  |                                                                                                                                                                  |
| SACOL0342 | -     | 1.95 | 2.73  | 1.40  | C4 |   | hypothetical protein                               | -                                                                                                                             |                                                                                                                                                                  |
| SACOL0343 | -     | 1.98 | 2.61  | 1.32  | C4 |   | prophage L54a, replicative DNA helicase, putative  | DNA metabolism: DNA replication, recombination, and repair; Mobile and extrachromosomal element functions: Prophage functions |                                                                                                                                                                  |
| SACOL0399 | -     | 4.30 | 1.99  | -2.16 | C4 | ♂ | ↑                                                  | oxidoreductase, putative                                                                                                      | Unknown function: Enzymes of unknown specificity                                                                                                                 |
| SACOL0437 | rpsF  | 2.12 | 2.67  | 1.26  | C4 |   | ribosomal protein S6                               | Protein synthesis: Ribosomal proteins: synthesis and modification                                                             |                                                                                                                                                                  |
| SACOL0438 | ssb2  | 2.05 | 2.75  | 1.34  | C4 |   | ↑                                                  | single-stranded DNA-binding protein                                                                                           | DNA metabolism: DNA replication, recombination, and repair                                                                                                       |
| SACOL0446 | -     | 2.54 | 1.79  | -1.42 | C4 | ♂ | ↑                                                  | conserved hypothetical protein                                                                                                | Hypothetical proteins: Conserved                                                                                                                                 |
| SACOL0447 | -     | 2.59 | 2.65  | 1.02  | C4 |   | phosphoglycerate mutase family protein             | Unknown function: General                                                                                                     |                                                                                                                                                                  |
| SACOL0585 | rplJ  | 4.41 | 6.46  | 1.46  | C4 |   | ribosomal protein L10                              | Protein synthesis: Ribosomal proteins: synthesis and modification                                                             |                                                                                                                                                                  |
| SACOL0620 | proP  | 2.74 | 3.43  | 1.25  | C4 |   | osmoprotectant proline transporter                 | Transport and binding proteins: Amino acids, peptides and amines                                                              |                                                                                                                                                                  |
| SACOL0630 | -     | 2.91 | 1.93  | -1.51 | C4 | ♂ | ↑                                                  | amino acid permease                                                                                                           | Transport and binding proteins: Amino acids, peptides and amines                                                                                                 |
| SACOL0671 | -     | 3.86 | 2.25  | -1.72 | C4 | ♂ | ↑                                                  | hydrolase, alpha/beta hydrolase fold family                                                                                   | Unknown function: Enzymes of unknown specificity                                                                                                                 |
| SACOL0673 | -     | 3.11 | 4.24  | 1.36  | C4 |   | hypothetical protein                               | -                                                                                                                             |                                                                                                                                                                  |
| SACOL0678 | -     | 4.16 | 3.04  | -1.37 | C4 | ♂ |                                                    | integrase/recombinase, phage integrase family                                                                                 | DNA metabolism: DNA replication, recombination, and repair                                                                                                       |
| SACOL0679 | -     | 3.11 | 2.78  | -1.12 | C4 | ♂ |                                                    | Na <sup>+</sup> /H <sup>+</sup> antiporter, MnhA component, putative                                                          | Transport and binding proteins: Cations and iron carrying compounds                                                                                              |
| SACOL0680 | -     | 2.95 | 3.08  | 1.04  | C4 | ♂ |                                                    | Na <sup>+</sup> /H <sup>+</sup> antiporter, MnhB component, putative                                                          | Transport and binding proteins: Cations and iron carrying compounds                                                                                              |
| SACOL0681 | -     | 3.33 | 3.50  | 1.05  | C4 | ♂ |                                                    | Na <sup>+</sup> /H <sup>+</sup> antiporter, MnhC component, putative                                                          | Transport and binding proteins: Cations and iron carrying compounds                                                                                              |
| SACOL0682 | -     | 3.03 | 3.13  | 1.03  | C4 | ♂ |                                                    | Na <sup>+</sup> /H <sup>+</sup> antiporter, MnhD component, putative                                                          | Transport and binding proteins: Cations and iron carrying compounds                                                                                              |
| SACOL0684 | -     | 2.62 | 2.84  | 1.08  | C4 | ♂ |                                                    | Na <sup>+</sup> /H <sup>+</sup> antiporter, MnhE component, putative                                                          | Transport and binding proteins: Cations and iron carrying compounds                                                                                              |
| SACOL0685 | -     | 2.46 | 2.87  | 1.17  | C4 | ♂ |                                                    | Na <sup>+</sup> /H <sup>+</sup> antiporter, MnhF component, putative                                                          | Transport and binding proteins: Cations and iron carrying compounds                                                                                              |
| SACOL0686 | -     | 2.42 | 2.62  | 1.08  | C4 | ♂ |                                                    | Na <sup>+</sup> /H <sup>+</sup> antiporter, MnhG component, putative                                                          | Transport and binding proteins: Cations and iron carrying compounds                                                                                              |
| SACOL0756 | -     | 2.70 | 4.93  | 1.83  | C4 |   | ebcS protein                                       | Unknown function: General                                                                                                     |                                                                                                                                                                  |
| SACOL0768 | -     | 3.39 | 2.55  | -1.33 | C4 |   | ↓                                                  | lipoprotein, putative                                                                                                         | Hypothetical proteins: Conserved                                                                                                                                 |
| SACOL0789 | -     | 3.06 | 3.09  | 1.01  | C4 |   | ↑                                                  | GTP cyclohydrolase I family protein                                                                                           | Unknown function: Enzymes of unknown specificity                                                                                                                 |
| SACOL0790 | -     | 1.77 | 2.51  | 1.41  | C4 |   | ↑                                                  | integral membrane domain protein                                                                                              | Unknown function: General                                                                                                                                        |
| SACOL0854 | -     | 3.56 | 5.14  | 1.44  | C4 |   | ↑                                                  | hypothetical protein                                                                                                          | -                                                                                                                                                                |
| SACOL0856 | clfA  | 3.30 | 3.01  | -1.09 | C4 | ♂ | ↑                                                  | clumping factor A                                                                                                             | Cellular processes: Pathogenesis                                                                                                                                 |
| SACOL0871 | -     | 3.28 | 6.21  | 1.89  | C4 |   | ↑                                                  | acetyltransferase, putative                                                                                                   | Unknown function: Enzymes of unknown specificity                                                                                                                 |
| SACOL0872 | -     | 3.61 | 3.26  | -1.11 | C4 |   | ↑                                                  | OsmC/Ohr family protein                                                                                                       | Unknown function: General                                                                                                                                        |
| SACOL1033 | -     | 3.28 | 4.19  | 1.28  | C4 |   | ↑                                                  | hypothetical protein                                                                                                          | -                                                                                                                                                                |
| SACOL1062 | atl   | 3.94 | 4.05  | 1.03  | C4 |   | ↑                                                  | bifunctional autolysin                                                                                                        | Cell envelope: Biosynthesis and degradation of surface polysaccharides and lipopolysaccharides                                                                   |
| SACOL1081 | purN  | 2.91 | 1.70  | -1.71 | C4 |   | ↑                                                  | phosphoribosylglycinamide formyltransferase                                                                                   | Purines, pyrimidines, nucleosides, and nucleotides: Purine ribonucleotide biosynthesis                                                                           |
| SACOL1082 | purH  | 2.52 | 1.68  | -1.50 | C4 |   | ↑                                                  | phosphoribosylaminoimidazolecarboxamide formyltransferase/IMP cyclohydrolase                                                  | Purines, pyrimidines, nucleosides, and nucleotides: Purine ribonucleotide biosynthesis                                                                           |
| SACOL1108 | -     | 2.53 | 3.76  | 1.49  | C4 |   | ↑                                                  | spermidine/putrescine ABC transporter, ATP-binding protein                                                                    | Transport and binding proteins: Amino acids, peptides and amines                                                                                                 |
| SACOL1109 | -     | 2.82 | 4.07  | 1.44  | C4 |   | ↑                                                  | spermidine/putrescine ABC transporter, permease protein                                                                       | Transport and binding proteins: Amino acids, peptides and amines                                                                                                 |
| SACOL1110 | -     | 2.62 | 3.53  | 1.35  | C4 |   | ↑                                                  | spermidine/putrescine ABC transporter, permease protein                                                                       | Transport and binding proteins: Amino acids, peptides and amines                                                                                                 |
| SACOL1111 | -     | 2.58 | 3.35  | 1.30  | C4 |   | ↑                                                  | spermidine/putrescine ABC transporter, spermidine/putrescine-binding protein                                                  | Transport and binding proteins: Amino acids, peptides and amines                                                                                                 |
| SACOL1183 | -     | 2.84 | 3.24  | 1.14  | C4 |   | ↑                                                  | membrane protein, putative                                                                                                    | Cell envelope: Other                                                                                                                                             |
| SACOL1254 | rpsP  | 3.84 | 3.34  | -1.15 | C4 |   | ↑                                                  | ribosomal protein S16                                                                                                         | Protein synthesis: Ribosomal proteins: synthesis and modification                                                                                                |
| SACOL1255 | rimM  | 3.51 | 3.99  | 1.14  | C4 |   | ↑                                                  | 16S rRNA processing protein RimM                                                                                              | Transcription: RNA processing                                                                                                                                    |
| SACOL1256 | trmD  | 3.42 | 3.96  | 1.16  | C4 |   | ↑                                                  | tRNA [guanine-N1]-methyltransferase                                                                                           | Protein synthesis: tRNA and rRNA base modification                                                                                                               |
| SACOL1292 | rpsO  | 2.27 | 2.61  | 1.15  | C4 |   | ↑                                                  | ribosomal protein S15                                                                                                         | Protein synthesis: Ribosomal proteins: synthesis and modification                                                                                                |
| SACOL1371 | guaC  | 4.01 | 1.95  | -2.06 | C4 |   | ↑                                                  | GMP reductase                                                                                                                 | Purines, pyrimidines, nucleosides, and nucleotides: Nucleotide and nucleoside interconversions                                                                   |
| SACOL1418 | -     | 2.78 | 1.66  | -1.68 | C4 |   | ↑                                                  | conserved hypothetical protein                                                                                                | Hypothetical proteins: Conserved                                                                                                                                 |
| SACOL1420 | -     | 2.52 | 2.72  | 1.08  | C4 |   | ↑                                                  | phosphate transport system protein PhoU, putative                                                                             | Transport and binding proteins: Anions                                                                                                                           |
| SACOL1421 | -     | 2.86 | 2.75  | -1.04 | C4 |   | ↑                                                  | phosphate ABC transporter, ATP-binding protein                                                                                | Transport and binding proteins: Anions                                                                                                                           |
| SACOL1422 | -     | 3.14 | 3.67  | 1.17  | C4 |   | ↑                                                  | phosphate ABC transporter, permease protein                                                                                   | Transport and binding proteins: Anions                                                                                                                           |
| SACOL1451 | arlR  | 1.95 | 2.62  | 1.34  | C4 |   | ↑                                                  | DNA-binding response regulator ArlR                                                                                           | Cellular processes: Pathogenesis; Regulatory functions: DNA interactions; Regulatory functions: Protein interactions; Signal transduction: Two-component systems |
| SACOL1453 | murG  | 2.88 | 1.80  | -1.60 | C4 |   | ↑                                                  | UDP-N-acetylglucosamine-N-acetylmuramyl-(pentapeptide) pyrophosphoryl transferase                                             | Cell envelope: Biosynthesis and degradation of murein sacculus and peptidoglycan                                                                                 |
| SACOL1550 | -     | 3.69 | 2.66  | -1.38 | C4 |   | ↑                                                  | transcriptional regulator, AraC family                                                                                        | Regulatory functions: DNA interactions                                                                                                                           |
| SACOL1576 | -     | 2.05 | 2.64  | 1.28  | C4 |   | ↑                                                  | traG protein, putative                                                                                                        | Mobile and extrachromosomal element functions: Plasmid functions                                                                                                 |
| SACOL1577 | -     | 2.15 | 2.71  | 1.27  | C4 |   | ↑                                                  | conserved hypothetical protein                                                                                                | Hypothetical proteins: Conserved                                                                                                                                 |
| SACOL1700 | rpmA  | 2.07 | 2.92  | 1.41  | C4 |   | ↑                                                  | ribosomal protein L27                                                                                                         | Protein synthesis: Ribosomal proteins: synthesis and modification                                                                                                |
| SACOL1701 | -     | 2.14 | 3.02  | 1.41  | C4 |   | ↑                                                  | conserved hypothetical protein                                                                                                | Hypothetical proteins: Conserved                                                                                                                                 |
| SACOL1769 | rpsD  | 3.54 | 2.57  | -1.37 | C4 |   | ↑                                                  | ribosomal protein S4                                                                                                          | Protein synthesis: Ribosomal proteins: synthesis and modification                                                                                                |
| SACOL1778 | tyrS  | 2.70 | 1.59  | -1.70 | C4 |   | ↑                                                  | tyrosyl-tRNA synthetase                                                                                                       | Protein synthesis: tRNA aminoacylation                                                                                                                           |
| SACOL1871 | epiG  | 3.69 | 1.91  | -1.93 | C4 | ♂ | ↑                                                  | epidermin immunity protein F                                                                                                  | Cellular processes: Toxin production and resistance                                                                                                              |
| SACOL1872 | epiE  | 3.32 | 2.24  | -1.48 | C4 | ♂ | ↑                                                  | epidermin immunity protein F                                                                                                  | Cellular processes: Toxin production and resistance                                                                                                              |
| SACOL1882 | -     | 2.02 | 2.59  | 1.28  | C4 |   | ↑                                                  | hypothetical protein                                                                                                          | -                                                                                                                                                                |
| SACOL1903 | -     | 2.02 | 2.61  | 1.29  | C4 |   | ↑                                                  | conserved hypothetical protein                                                                                                | Hypothetical proteins: Conserved                                                                                                                                 |
| SACOL1935 | -     | 2.56 | 2.32  | -1.10 | C4 |   | ↑                                                  | conserved hypothetical protein                                                                                                | Hypothetical proteins: Conserved                                                                                                                                 |
| SACOL1939 | -     | 2.50 | 2.44  | -1.02 | C4 |   | ↑                                                  | phosphotyrosine protein phosphatase                                                                                           | Regulatory functions: Protein interactions                                                                                                                       |
| SACOL1952 | -     | 3.71 | 6.34  | 1.71  | C4 |   | ↓                                                  | ferritin family protein                                                                                                       | Transport and binding proteins: Cations and iron carrying compounds                                                                                              |
| SACOL2012 | -     | 3.76 | 2.74  | -1.38 | C4 |   | ↓                                                  | acetyltransferase, GNAT family                                                                                                | Unknown function: Enzymes of unknown specificity                                                                                                                 |
| SACOL2013 | -     | 3.66 | 2.73  | -1.34 | C4 |   | ↓                                                  | hypothetical protein                                                                                                          | -                                                                                                                                                                |
| SACOL2019 | -     | 3.81 | 3.27  | -1.17 | C4 |   | ↓                                                  | sdhH protein, putative                                                                                                        | Cell envelope: Other                                                                                                                                             |
| SACOL2067 | kdpB  | 2.78 | 3.86  | 1.39  | C4 |   | ↓                                                  | K <sup>+</sup> -transporting ATPase, B subunit                                                                                | Transport and binding proteins: Cations and iron carrying compounds                                                                                              |
| SACOL2131 | -     | 3.48 | 6.44  | 1.85  | C4 |   | ↓                                                  | Dps family protein                                                                                                            | Cellular processes: Adaptations to atypical conditions                                                                                                           |
| SACOL2137 | czrA  | 6.47 | 7.32  | 1.13  | C4 |   | ↓                                                  | transcriptional regulator CzrA                                                                                                | Regulatory functions: DNA interactions                                                                                                                           |
| SACOL2138 | -     | 6.73 | 7.85  | 1.17  | C4 |   | ↓                                                  | cation efflux family protein                                                                                                  | Transport and binding proteins: Cations and iron carrying compounds                                                                                              |
| SACOL2176 | opuD2 | 3.84 | 2.21  | -1.74 | C4 | ♂ | ↑                                                  | osmoprotectant transporter, BCCT family                                                                                       | Transport and binding proteins: Amino acids, peptides and amines                                                                                                 |
| SACOL2197 | -     | 9.21 | 11.87 | 1.29  | C4 | ♂ | ↑                                                  | surface protein, putative                                                                                                     | Cell envelope: Other                                                                                                                                             |
| SACOL2287 | sarR  | 2.19 | 2.54  | 1.16  | C4 |   | ↑                                                  | staphylococcal accessory regulator R                                                                                          | Cellular processes: Toxin production and resistance; Regulatory functions: Other; Cellular processes: Pathogenesis; Regulatory functions: DNA interactions       |
| SACOL2295 | -     | 5.46 | 7.21  | 1.32  | C4 |   | ↑                                                  | staphyloxanthin biosynthesis protein, putative                                                                                | Cellular processes: Pathogenesis                                                                                                                                 |
| SACOL2398 | nirB  | 2.76 | 2.37  | -1.16 | C4 |   | ↑                                                  | nitrite reductase [NAD(P)H], large subunit                                                                                    | Central intermediary metabolism: Nitrogen metabolism                                                                                                             |
| SACOL2434 | -     | 3.04 | 3.17  | 1.04  | C4 | ♂ | ↑                                                  | membrane protein, putative                                                                                                    | Cell envelope: Other                                                                                                                                             |
| SACOL2477 | -     | 2.58 | 1.79  | -1.44 | C4 |   | ↑                                                  | conserved hypothetical protein                                                                                                | Hypothetical proteins: Conserved                                                                                                                                 |
| SACOL2481 | -     | 3.38 | 2.24  | -1.51 | C4 |   | ↑                                                  | hypothetical protein                                                                                                          | -                                                                                                                                                                |
| SACOL2510 | -     | 1.91 | 2.77  | 1.45  | C4 |   | ↑                                                  | hypothetical protein                                                                                                          | -                                                                                                                                                                |
| SACOL2511 | fnbA  | 2.97 | 5.44  | 1.83  | C4 |   | ↑                                                  | fibronectin-binding protein A                                                                                                 | Cell envelope: Other; Cellular processes: Pathogenesis                                                                                                           |
| SACOL2554 | -     | 2.82 | 1.74  | -1.62 | C4 | ♂ | ↑                                                  | membrane protein, putative                                                                                                    | Cell envelope: Other                                                                                                                                             |
| SACOL2557 | -     | 4.33 | 2.64  | -1.64 | C4 | ♂ | ↑                                                  | conserved domain protein                                                                                                      | Hypothetical proteins: Domain                                                                                                                                    |

|           |       |        |        |       |    |                                                                        |                                                                                                                                                                  |
|-----------|-------|--------|--------|-------|----|------------------------------------------------------------------------|------------------------------------------------------------------------------------------------------------------------------------------------------------------|
| SACOL2631 | -     | 2.50   | 2.53   | 1.01  | C4 | conserved hypothetical protein                                         | Hypothetical proteins: Conserved                                                                                                                                 |
| SACOL2735 | -     | 4.15   | 4.75   | 1.14  | C4 | chromosome partitioning protein, ParB family                           | Cellular processes: Cell division                                                                                                                                |
| SACOL2736 | gidB  | 3.18   | 4.03   | 1.27  | C4 | glucose-inhibited division protein B                                   | Unknown function: General                                                                                                                                        |
| SACOL2737 | gidA  | 3.57   | 4.33   | 1.21  | C4 | glucose inhibited division protein A                                   | Unknown function: General                                                                                                                                        |
| SACOL2738 | trmE  | 3.56   | 4.00   | 1.13  | C4 | rRNA modification GTPase TrmE                                          | Cellular processes: Detoxification                                                                                                                               |
| SACOL2739 | rnpA  | 3.52   | 4.50   | 1.28  | C4 | ribonuclease P protein component                                       | Transcription: RNA processing                                                                                                                                    |
| SACOL2740 | rpmH  | 2.44   | 2.85   | 1.17  | C4 | ribosomal protein L34                                                  | Protein synthesis: Ribosomal proteins: synthesis and modification                                                                                                |
| SACOL0024 | sasH  | -3.45  | -4.89  | -1.42 | C5 | 5-nucleotidase family protein                                          | Purines, pyrimidines, nucleosides, and nucleotides: Other                                                                                                        |
| SACOL0032 | maoC  | -1.95  | -2.49  | -1.28 | C5 | MAoC domain protein                                                    | Unknown function: General                                                                                                                                        |
| SACOL0052 | -     | -1.86  | -2.63  | -1.41 | C5 | glycosyl transferase, group 1 family protein                           | Cell envelope: Biosynthesis and degradation of surface polysaccharides and lipopolysaccharides                                                                   |
| SACOL0058 | -     | -2.78  | -3.05  | -1.10 | C5 | conserved hypothetical protein                                         | Hypothetical proteins: Conserved                                                                                                                                 |
| SACOL0099 | sirA  | -3.24  | -2.47  | 1.31  | C5 | iron compound ABC transporter, iron compound-binding protein SirA      | Cell envelope: Other; Transport and binding proteins: Cations and iron carrying compounds                                                                        |
| SACOL0109 | -     | -1.83  | -2.60  | -1.42 | C5 | hypothetical protein                                                   | -                                                                                                                                                                |
| SACOL0110 | -     | -2.20  | -3.58  | -1.63 | C5 | hypothetical protein                                                   | -                                                                                                                                                                |
| SACOL0192 | -     | -4.90  | -3.19  | 1.54  | C5 | maltose ABC transporter, ATP-binding protein, putative                 | Transport and binding proteins: Carbohydrates, organic alcohols, and acids                                                                                       |
| SACOL0218 | -     | -2.46  | -4.44  | -1.80 | C5 | conserved hypothetical protein                                         | Hypothetical proteins: Conserved                                                                                                                                 |
| SACOL0236 | -     | -2.17  | -3.44  | -1.58 | C5 | 4-diphosphocytidyl-2C-methyl-D-erythritol synthase, putative           | Biosynthesis of cofactors, prosthetic groups, and carriers: Other                                                                                                |
| SACOL0246 | lytR  | -2.19  | -2.86  | -1.30 | C5 | response regulator LytR                                                | Cell envelope: Biosynthesis and degradation of murein sacculus and peptidoglycan: Pathogenesis; Regulatory functions; Signal transduction: Two-component systems |
| SACOL0284 | -     | -3.08  | -4.38  | -1.42 | C5 | conserved hypothetical protein                                         | Hypothetical proteins: Conserved                                                                                                                                 |
| SACOL0297 | -     | -1.94  | -2.67  | -1.38 | C5 | conserved hypothetical protein                                         | Hypothetical proteins: Conserved                                                                                                                                 |
| SACOL0302 | brnQ2 | -3.68  | -2.70  | 1.36  | C5 | branched-chain amino acid transport system II carrier protein          | Transport and binding proteins: Amino acids, peptides and amines                                                                                                 |
| SACOL0303 | -     | -5.88  | -14.78 | -2.51 | C5 | acid phosphatase5-nucleotidase, lipoprotein (P4) family                | Transport and binding proteins: Other; Biosynthesis of cofactors, prosthetic groups, and carriers: Pyridine nucleotides                                          |
| SACOL0417 | -     | -4.54  | -2.67  | 1.70  | C5 | MtbB family protein                                                    | Protein fate: Protein and peptide secretion and trafficking                                                                                                      |
| SACOL0418 | -     | -4.15  | -2.46  | 1.69  | C5 | mttA/Hcf106 family protein                                             | Protein fate: Protein and peptide secretion and trafficking                                                                                                      |
| SACOL0419 | -     | -5.67  | -2.79  | 2.03  | C5 | hypothetical protein                                                   | -                                                                                                                                                                |
| SACOL0512 | -     | -3.72  | -2.12  | 1.75  | C5 | conserved hypothetical protein                                         | -                                                                                                                                                                |
| SACOL0553 | tlpS  | -2.53  | -1.74  | 1.46  | C5 | trNA(ile)-lysine synthetase                                            | Hypothetical proteins: Conserved                                                                                                                                 |
| SACOL0566 | nupC  | -2.75  | -3.30  | -1.20 | C5 | nucleoside permease NupC                                               | Protein synthesis: tRNA and rRNA base modification                                                                                                               |
| SACOL0604 | -     | -2.74  | -2.50  | 1.09  | C5 | deoxynucleoside kinase family protein                                  | Transport and binding proteins: Nucleosides, purines and pyrimidines                                                                                             |
| SACOL0649 | -     | -2.65  | -1.87  | 1.41  | C5 | conserved hypothetical protein                                         | Purines, pyrimidines, nucleosides, and nucleotides: Nucleotide and nucleoside interconversions                                                                   |
| SACOL0650 | -     | -2.51  | -1.84  | 1.36  | C5 | conserved hypothetical protein                                         | Hypothetical proteins: Conserved                                                                                                                                 |
| SACOL0651 | -     | -4.20  | -2.18  | 1.93  | C5 | conserved hypothetical protein                                         | Hypothetical proteins: Conserved                                                                                                                                 |
| SACOL0653 | -     | -2.91  | -1.70  | 1.71  | C5 | conserved hypothetical protein                                         | Hypothetical proteins: Conserved                                                                                                                                 |
| SACOL0688 | -     | -4.65  | -9.59  | -2.06 | C5 | ABC transporter, substrate-binding protein                             | Transport and binding proteins: Unknown substrate                                                                                                                |
| SACOL0689 | -     | -7.06  | -9.80  | -1.39 | C5 | ABC transporter, permease protein                                      | Transport and binding proteins: Unknown substrate                                                                                                                |
| SACOL0690 | -     | -5.84  | -10.93 | -1.87 | C5 | ABC transporter, ATP-binding protein                                   | Transport and binding proteins: Unknown substrate                                                                                                                |
| SACOL0693 | tagA  | -2.91  | -2.37  | 1.23  | C5 | UDP-N-acetyl-D-mannosamine transferase                                 | Cell envelope: Biosynthesis and degradation of murein sacculus and peptidoglycan                                                                                 |
| SACOL0815 | -     | -3.34  | -6.41  | -1.92 | C5 | ribosomal subunit interface protein                                    | Protein synthesis: Translation factors                                                                                                                           |
| SACOL0860 | nuc   | -5.73  | -14.78 | -2.58 | C5 | thermonuclease precursor                                               | DNA metabolism: Degradation of DNA                                                                                                                               |
| SACOL0887 | sei   | -1.98  | -3.12  | -1.58 | C5 | staphylococcal enterotoxin type I                                      | Cellular processes: Toxin production and resistance; Cellular processes: Pathogenesis                                                                            |
| SACOL0889 | -     | -2.24  | -2.59  | -1.16 | C5 | pathogenicity island protein                                           | Cellular processes: Pathogenesis                                                                                                                                 |
| SACOL0922 | -     | -2.85  | -3.10  | -1.09 | C5 | conserved hypothetical protein                                         | Hypothetical proteins: Conserved                                                                                                                                 |
| SACOL0924 | -     | -2.73  | -2.96  | -1.08 | C5 | conserved hypothetical protein                                         | Hypothetical proteins: Conserved                                                                                                                                 |
| SACOL0930 | -     | -2.62  | -2.79  | -1.07 | C5 | conserved hypothetical protein                                         | Hypothetical proteins: Conserved                                                                                                                                 |
| SACOL0959 | -     | -4.22  | -3.21  | 1.31  | C5 | NADH-dependent flavin oxidoreductase, Oye family                       | Unknown function: Enzymes of unknown specificity                                                                                                                 |
| SACOL0975 | cdr   | -2.15  | -3.38  | -1.57 | C5 | CoA-disulfide reductase                                                | Energy metabolism: Electron transport                                                                                                                            |
| SACOL0976 | -     | -2.44  | -3.45  | -1.41 | C5 | hydrolase, haloacid dehalogenase-like family                           | Unknown function: Enzymes of unknown specificity                                                                                                                 |
| SACOL1005 | pepF  | -2.88  | -3.03  | -1.05 | C5 | oligoendopeptidase F                                                   | Protein fate: Degradation of proteins, peptides, and glycopeptides                                                                                               |
| SACOL1028 | htrA  | -1.76  | -2.58  | -1.46 | C5 | serine protease                                                        | Protein fate: Degradation of proteins, peptides, and glycopeptides; Cellular processes: Pathogenesis                                                             |
| SACOL1034 | -     | -2.90  | -4.32  | -1.49 | C5 | lipote-protein ligase A family protein                                 | Protein fate: Protein modification and repair                                                                                                                    |
| SACOL1048 | -     | -3.30  | -2.58  | 1.28  | C5 | acetyltransferase, GNAT family                                         | Unknown function: Enzymes of unknown specificity                                                                                                                 |
| SACOL1094 | cydA  | -2.81  | -2.19  | 1.28  | C5 | cytochrome d ubiquinol oxidase, subunit I                              | Energy metabolism: Electron transport                                                                                                                            |
| SACOL1095 | cydB  | -2.75  | -2.15  | 1.28  | C5 | cytochrome d ubiquinol oxidase, subunit II                             | Energy metabolism: Electron transport                                                                                                                            |
| SACOL1115 | -     | -2.32  | -3.53  | -1.52 | C5 | conserved hypothetical protein                                         | Hypothetical proteins: Conserved                                                                                                                                 |
| SACOL1140 | sasE  | -5.88  | -5.72  | 1.03  | C5 | LPXTG cell wall surface anchor protein                                 | Cell envelope: Other                                                                                                                                             |
| SACOL1142 | isdD  | -2.74  | -1.71  | 1.60  | C5 | hypothetical protein                                                   | -                                                                                                                                                                |
| SACOL1143 | -     | -2.78  | -1.73  | 1.60  | C5 | iron compound ABC transporter, iron compound-binding protein, putative | Cell envelope: Other; Transport and binding proteins: Cations and iron carrying compounds                                                                        |
| SACOL1145 | srtB  | -2.56  | -2.78  | -1.09 | C5 | sortase B                                                              | Cell envelope: Other                                                                                                                                             |
| SACOL1150 | rmhC  | -2.20  | -2.49  | -1.13 | C5 | ribonuclease HIII                                                      | DNA metabolism: DNA replication, recombination, and repair                                                                                                       |
| SACOL1206 | ileS  | -2.46  | -3.72  | -1.52 | C5 | isoleucyl-tRNA synthetase                                              | Protein synthesis: tRNA aminoacylation                                                                                                                           |
| SACOL1296 | -     | -3.37  | -2.77  | 1.22  | C5 | transcriptional regulator, GntR family, putative                       | Regulatory functions: DNA interactions                                                                                                                           |
| SACOL1297 | -     | -5.26  | -3.06  | 1.72  | C5 | conserved hypothetical protein                                         | Hypothetical proteins: Conserved                                                                                                                                 |
| SACOL1298 | -     | -3.04  | -4.03  | -1.33 | C5 | peptidase, M16 family                                                  | Protein fate: Degradation of proteins, peptides, and glycopeptides                                                                                               |
| SACOL1299 | -     | -2.85  | -4.16  | -1.46 | C5 | acetoacetyl-CoA reductase, putative                                    | Fatty acid and phospholipid metabolism: Biosynthesis                                                                                                             |
| SACOL1300 | -     | -2.34  | -3.87  | -1.65 | C5 | ACT domain protein                                                     | Unknown function: General                                                                                                                                        |
| SACOL1321 | glpD  | -2.05  | -3.90  | -1.42 | C5 | aerobic glycerol-3-phosphate dehydrogenase                             | Energy metabolism: Other                                                                                                                                         |
| SACOL1328 | glmR  | -2.34  | -2.00  | -1.28 | C5 | glutamine synthetase repressor                                         | Cellular processes: Toxin production and resistance; Regulatory functions: DNA interactions                                                                      |
| SACOL1419 | -     | -10.64 | -11.53 | -1.08 | C5 | oligoendopeptidase F, putative                                         | Protein fate: Degradation of proteins, peptides, and glycopeptides                                                                                               |
| SACOL1438 | -     | -5.99  | -5.02  | 1.19  | C5 | conserved hypothetical protein                                         | Hypothetical proteins: Conserved                                                                                                                                 |
| SACOL1471 | -     | -2.77  | -1.77  | 1.56  | C5 | cell wall enzyme EbsB, putative                                        | Cell envelope: Other; Protein fate: Degradation of proteins, peptides, and glycopeptides                                                                         |
| SACOL1481 | -     | -3.88  | -4.73  | -1.22 | C5 | conserved hypothetical protein                                         | Hypothetical proteins: Conserved                                                                                                                                 |
| SACOL1495 | -     | -2.06  | -3.14  | -1.52 | C5 | DNA polymerase III, epsilon subunit/ATP-dependent helicase DinG        | DNA metabolism: DNA replication, recombination, and repair                                                                                                       |
| SACOL1496 | birA  | -2.28  | -2.57  | -1.13 | C5 | birA bifunctional protein                                              | Biosynthesis of cofactors, prosthetic groups, and carriers: Biotin; Protein fate: Protein modification and repair; Regulatory functions: DNA interactions        |
| SACOL1530 | -     | -2.16  | -2.54  | -1.17 | C5 | lipoprotein, putative                                                  | Cell envelope: Other                                                                                                                                             |
| SACOL1552 | malR  | -3.46  | -2.28  | 1.51  | C5 | maltose operon repressor                                               | Regulatory functions: DNA interactions                                                                                                                           |
| SACOL1564 | recN  | -2.71  | -3.76  | -1.39 | C5 | DNA repair protein RecN                                                | DNA metabolism: DNA replication, recombination, and repair                                                                                                       |
| SACOL1565 | argR  | -3.99  | -3.93  | 1.02  | C5 | arginine repressor                                                     | Amino acid biosynthesis: Glutamate family; Regulatory functions: DNA interactions                                                                                |
| SACOL1674 | -     | -2.47  | -1.94  | 1.27  | C5 | helicase, putative, RecD/TraA family                                   | Unknown function: Enzymes of unknown specificity                                                                                                                 |
| SACOL1743 | -     | -2.17  | -2.89  | -1.33 | C5 | amino acid permease                                                    | Transport and binding proteins: Amino acids, peptides and amines                                                                                                 |
| SACOL1771 | -     | -2.38  | -3.39  | -1.42 | C5 | OsmC/Ohr family protein                                                | Unknown function: General                                                                                                                                        |
| SACOL1777 | -     | -3.69  | -4.74  | -1.29 | C5 | serine protease HtrA, putative                                         | Protein fate: Degradation of proteins, peptides, and glycopeptides                                                                                               |
| SACOL1816 | putA  | -4.11  | -2.21  | 1.86  | C5 | proline dehydrogenase                                                  | Energy metabolism: Amino acids and amines                                                                                                                        |
| SACOL1818 | ribBA | -3.15  | -2.12  | 1.48  | C5 | 3,4-dihydroxy-2-butanone-4-phosphate synthase/GTP cyclohydrolase II    | Biosynthesis of cofactors, prosthetic groups, and carriers: Riboflavin, FMN, and FAD                                                                             |
| SACOL1819 | ribE  | -3.59  | -1.96  | 1.83  | C5 | riboflavin synthase, alpha subunit                                     | Biosynthesis of cofactors, prosthetic groups, and carriers: Riboflavin, FMN, and FAD                                                                             |
| SACOL1820 | ribD  | -3.41  | -1.94  | 1.76  | C5 | riboflavin biosynthesis protein RibD                                   | Biosynthesis of cofactors, prosthetic groups, and carriers: Riboflavin, FMN, and FAD                                                                             |
| SACOL1833 | -     | -2.96  | -2.09  | 1.42  | C5 | crbB family protein                                                    | Unknown function: General                                                                                                                                        |

|           |       |       |       |       |    |                                                                          |                                                                                                                         |
|-----------|-------|-------|-------|-------|----|--------------------------------------------------------------------------|-------------------------------------------------------------------------------------------------------------------------|
| SACOL1838 | pckA  | -3.24 | -2.43 | 1.33  | C5 | phosphoenolpyruvate carboxykinase (ATP)                                  | Energy metabolism: Glycolysis/gluconeogenesis                                                                           |
| SACOL1840 | -     | -3.26 | -5.42 | -1.66 | C5 | conserved hypothetical protein                                           | Hypothetical proteins: Conserved                                                                                        |
| SACOL1841 | ytbD  | -4.82 | -5.30 | -1.10 | C5 | nucleoside triphosphatase Ytd                                            | DNA metabolism: DNA replication, recombination, and repair                                                              |
| SACOL1844 | -     | -3.47 | -6.46 | -1.86 | C5 | O-succinylbenzoyl acid-CoA ligase, putative                              | Biosynthesis of cofactors, prosthetic groups, and carriers: Menaquinone and ubiquinone                                  |
| SACOL1848 | -     | -4.91 | -5.68 | -1.16 | C5 | lipoprotein, putative                                                    | -                                                                                                                       |
| SACOL1851 | -     | -3.42 | -3.39 | 1.01  | C5 | hypothetical protein                                                     | -                                                                                                                       |
| SACOL1893 | -     | -2.20 | -3.67 | -1.67 | C5 | ABC transporter, ATP-binding protein                                     | Transport and binding proteins: Unknown substrate                                                                       |
| SACOL1946 | -     | -3.35 | -4.13 | -1.23 | C5 | methionine aminopeptidase, type I                                        | Protein fate: Protein modification and repair                                                                           |
| SACOL1984 | aldA2 | -2.24 | -3.14 | -1.40 | C5 | aldehyde dehydrogenase                                                   | Energy metabolism: Fermentation                                                                                         |
| SACOL1992 | -     | -2.60 | -2.19 | 1.19  | C5 | conserved hypothetical protein                                           | Hypothetical proteins: Conserved                                                                                        |
| SACOL2017 | groES | -2.11 | -2.79 | -1.32 | C5 | chaperonin, 10 kDa                                                       | Protein fate: Protein folding and stabilization                                                                         |
| SACOL2075 | ftsW  | -2.53 | -2.73 | -1.08 | C5 | cell division protein, FtsW/RodA/SpoVE family                            | Cellular processes: Cell division                                                                                       |
| SACOL2130 | deoD2 | -2.24 | -3.23 | -1.44 | C5 | purine nucleoside phosphorylase                                          | Purines, pyrimidines, nucleosides, and nucleotides: Salvage of nucleosides and nucleotides                              |
| SACOL2146 | -     | -3.42 | -5.27 | -1.54 | C5 | PTS system, manitol-specific IIBC components                             | Transport and binding proteins: Carbohydrates, organic alcohols, and acids; Signal transduction: PTS                    |
| SACOL2164 | -     | -4.24 | -3.86 | 1.10  | C5 | conserved hypothetical protein                                           | Hypothetical proteins: Conserved                                                                                        |
| SACOL2179 | -     | -2.05 | -2.97 | -1.44 | C5 | conserved hypothetical protein                                           | Hypothetical proteins: Conserved                                                                                        |
| SACOL2193 | -     | -3.04 | -4.85 | -1.59 | C5 | transcriptional regulator, MerR family                                   | Regulatory functions: DNA interactions                                                                                  |
| SACOL2273 | fdhD  | -3.30 | -1.84 | 1.80  | C5 | formate dehydrogenase accessory protein FdhD                             | Energy metabolism: Anaerobic; Energy metabolism: Electron transport                                                     |
| SACOL2280 | ureA  | -2.95 | -3.11 | -1.05 | C5 | urease, gamma subunit                                                    | Central intermediary metabolism: Nitrogen metabolism                                                                    |
| SACOL2281 | ureB  | -3.19 | -2.88 | 1.11  | C5 | urease, beta subunit                                                     | Central intermediary metabolism: Nitrogen metabolism                                                                    |
| SACOL2306 | -     | -4.23 | -5.94 | -1.41 | C5 | abortive infection protein family                                        | Unknown function: General                                                                                               |
| SACOL2310 | -     | -2.36 | -2.73 | -1.16 | C5 | conserved hypothetical protein                                           | Hypothetical proteins: Conserved                                                                                        |
| SACOL2311 | -     | -1.75 | -2.49 | -1.43 | C5 | hypothetical protein                                                     | -                                                                                                                       |
| SACOL2362 | mqo1  | -2.70 | -5.06 | -1.87 | C5 | malate:quinone oxidoreductase                                            | Energy metabolism: TCA cycle                                                                                            |
| SACOL2470 | -     | -2.64 | -3.35 | -1.27 | C5 | hypothetical protein                                                     | -                                                                                                                       |
| SACOL2486 | -     | -2.34 | -4.15 | -1.77 | C5 | hypothetical protein                                                     | -                                                                                                                       |
| SACOL2487 | -     | -3.35 | -3.47 | -1.03 | C5 | conserved hypothetical protein                                           | Hypothetical proteins: Conserved                                                                                        |
| SACOL2488 | -     | -2.81 | -3.33 | -1.18 | C5 | oxidoreductase, short-chain dehydrogenase/reductase family               | Unknown function: Enzymes of unknown specificity                                                                        |
| SACOL2491 | -     | -2.93 | -4.08 | -1.39 | C5 | conserved hypothetical protein                                           | Hypothetical proteins: Conserved                                                                                        |
| SACOL2501 | -     | -2.63 | -4.77 | -1.81 | C5 | phosphoglucomutase/phosphomannomutase family protein                     | Energy metabolism: Sugars                                                                                               |
| SACOL2502 | -     | -4.45 | -3.18 | 1.40  | C5 | hypothetical protein                                                     | -                                                                                                                       |
| SACOL2503 | -     | -3.47 | -2.87 | 1.21  | C5 | hypothetical protein                                                     | -                                                                                                                       |
| SACOL2518 | -     | -3.77 | -5.19 | -1.38 | C5 | conserved hypothetical protein                                           | Hypothetical proteins: Conserved                                                                                        |
| SACOL2522 | -     | -3.05 | -2.40 | 1.27  | C5 | DedA family protein                                                      | Unknown function: General                                                                                               |
| SACOL2551 | -     | -2.48 | -2.53 | -1.02 | C5 | conserved hypothetical protein TIGR00051                                 | Hypothetical proteins: Conserved                                                                                        |
| SACOL2606 | pyrD  | -2.68 | -1.97 | 1.36  | C5 | dihydroorotate dehydrogenase                                             | Purines, pyrimidines, nucleosides, and nucleotides: Pyrimidine ribonucleotide biosynthesis                              |
| SACOL2660 | isaB  | -2.72 | -4.70 | -1.73 | C5 | immunodominant antigen B                                                 | Unknown function: General                                                                                               |
| SACOL0003 | -     | -1.49 | -2.80 | -1.88 | C6 | conserved hypothetical protein                                           | Hypothetical proteins: Conserved                                                                                        |
| SACOL0004 | -     | -1.61 | -2.68 | -1.66 | C6 | recF protein                                                             | DNA metabolism: DNA replication, recombination, and repair                                                              |
| SACOL0005 | gyrB  | -1.57 | -2.59 | -1.65 | C6 | DNA gyrase, B subunit                                                    | DNA metabolism: DNA replication, recombination, and repair                                                              |
| SACOL0006 | gyrA  | -1.76 | -3.93 | -2.23 | C6 | DNA gyrase, A subunit                                                    | DNA metabolism: DNA replication, recombination, and repair                                                              |
| SACOL0009 | serS  | -2.11 | -3.72 | -1.77 | C6 | seryl-tRNA synthetase                                                    | Protein synthesis: tRNA aminoacylation                                                                                  |
| SACOL0023 | yycJ  | -1.47 | -3.01 | -2.04 | C6 | metallo-beta-lactamase family protein YycJ                               | Unknown function: General                                                                                               |
| SACOL0025 | -     | -1.45 | -3.22 | -2.23 | C6 | conserved hypothetical protein                                           | Hypothetical proteins: Conserved                                                                                        |
| SACOL0173 | ipdC  | -1.35 | -3.80 | -2.80 | C6 | indole-3-pyruvate decarboxylase                                          | Central intermediary metabolism: Other                                                                                  |
| SACOL0181 | -     | -1.62 | -3.09 | -1.90 | C6 | conserved domain protein                                                 | Hypothetical proteins: Domain                                                                                           |
| SACOL0182 | -     | -2.13 | -4.50 | -2.11 | C6 | hypothetical protein                                                     | -                                                                                                                       |
| SACOL0183 | -     | -1.57 | -2.65 | -1.69 | C6 | hypothetical protein                                                     | -                                                                                                                       |
| SACOL0219 | -     | -2.38 | -9.53 | -4.00 | C6 | hypothetical protein                                                     | -                                                                                                                       |
| SACOL0220 | -     | -1.74 | -3.62 | -2.08 | C6 | flavoheomprotein, putative                                               | Unknown function: General                                                                                               |
| SACOL0225 | -     | -2.50 | -4.95 | -1.98 | C6 | inosine-uridine preferring nucleoside hydrolase                          | Purines, pyrimidines, nucleosides, and nucleotides: Salvage of nucleosides and nucleotides                              |
| SACOL0274 | -     | -1.71 | -6.28 | -3.68 | C6 | conserved hypothetical protein                                           | Hypothetical proteins: Conserved                                                                                        |
| SACOL0275 | -     | -1.60 | -6.37 | -3.98 | C6 | conserved hypothetical protein                                           | Hypothetical proteins: Conserved                                                                                        |
| SACOL0299 | -     | -1.30 | -2.69 | -2.07 | C6 | lipoprotein, putative                                                    | -                                                                                                                       |
| SACOL0477 | -     | -1.72 | -3.55 | -2.06 | C6 | type I restriction-modification system, S subunit, EcoA family, putative | DNA metabolism: Restriction/modification                                                                                |
| SACOL0478 | -     | -2.39 | -4.32 | -1.80 | C6 | exotoxin 3, putative                                                     | Cellular processes: Toxin production and resistance                                                                     |
| SACOL0536 | ksgA  | -1.50 | -2.54 | -1.69 | C6 | dimethyladenosine transferase                                            | Cellular processes: Toxin production and resistance; Protein synthesis: tRNA and rRNA base modification                 |
| SACOL0558 | folP  | -1.96 | -4.08 | -2.08 | C6 | dihydropteroteate synthase                                               | Biosynthesis of cofactors, prosthetic groups, and carriers: Folic acid                                                  |
| SACOL0564 | -     | -1.37 | -4.28 | -3.11 | C6 | pyridoxine biosynthesis protein                                          | Biosynthesis of cofactors, prosthetic groups, and carriers: Pyridoxine                                                  |
| SACOL0567 | ctsR  | -1.68 | -2.63 | -1.57 | C6 | transcriptional regulator CtsR                                           | Regulatory functions: DNA interactions                                                                                  |
| SACOL0602 | -     | -1.35 | -2.48 | -1.83 | C6 | hydrolase, haloacid dehalogenase-like family                             | Unknown function: Enzymes of unknown specificity                                                                        |
| SACOL0633 | -     | -1.71 | -5.11 | -3.00 | C6 | conserved hypothetical protein                                           | Hypothetical proteins: Conserved                                                                                        |
| SACOL0714 | -     | -1.64 | -2.84 | -1.73 | C6 | acetyltransferase, GNAT family                                           | Unknown function: Enzymes of unknown specificity                                                                        |
| SACOL0739 | -     | -1.49 | -3.61 | -2.42 | C6 | acetyltransferase, GNAT family                                           | Unknown function: Enzymes of unknown specificity                                                                        |
| SACOL0781 | -     | -1.37 | -2.82 | -2.07 | C6 | osmoprotectant ABC transporter, ATP-binding protein, putative            | Transport and binding proteins: Amino acids, peptides and amines                                                        |
| SACOL0799 | -     | -1.41 | -2.74 | -1.94 | C6 | transferrin receptor                                                     | Cell envelope: Other; Transport and binding proteins: Cations and iron carrying compounds                               |
| SACOL0833 | clpP  | -1.35 | -3.35 | -2.48 | C6 | ATP-dependent Clp protease, proteolytic subunit ClpP                     | Protein fate: Degradation of proteins, peptides, and glycopeptides                                                      |
| SACOL0849 | -     | -1.30 | -4.61 | -3.55 | C6 | hypothetical protein                                                     | -                                                                                                                       |
| SACOL0850 | -     | -1.49 | -3.03 | -2.03 | C6 | hypothetical protein                                                     | -                                                                                                                       |
| SACOL0851 | -     | -2.35 | -4.89 | -2.08 | C6 | lipoprotein, putative                                                    | -                                                                                                                       |
| SACOL0859 | -     | -1.88 | -3.11 | -1.65 | C6 | hypothetical protein                                                     | -                                                                                                                       |
| SACOL0875 | -     | -1.24 | -3.21 | -2.59 | C6 | thioredoxin, putative                                                    | Energy metabolism: Electron transport                                                                                   |
| SACOL0876 | -     | -1.56 | -3.80 | -2.44 | C6 | arsenate reductase, putative                                             | Cellular processes: Detoxification                                                                                      |
| SACOL0877 | gcvH  | -1.35 | -2.90 | -2.16 | C6 | glycine cleavage system H protein                                        | Energy metabolism: Amino acids and amines                                                                               |
| SACOL0888 | -     | -1.91 | -3.39 | -1.78 | C6 | pathogenicity island, lipoprotein, putative                              | Cell envelope: Other; Cellular processes: Pathogenesis                                                                  |
| SACOL0925 | -     | -1.66 | -2.69 | -1.63 | C6 | conserved hypothetical protein                                           | Hypothetical proteins: Conserved                                                                                        |
| SACOL0926 | -     | -1.43 | -2.98 | -2.08 | C6 | 5-nucleotidase family protein                                            | Purines, pyrimidines, nucleosides, and nucleotides: Other                                                               |
| SACOL0931 | -     | -1.62 | -2.74 | -1.70 | C6 | hydrolase, haloacid dehalogenase-like family                             | Unknown function: Enzymes of unknown specificity                                                                        |
| SACOL0944 | -     | -1.52 | -3.49 | -2.30 | C6 | NADH dehydrogenase, putative                                             | Energy metabolism: Electron transport                                                                                   |
| SACOL0977 | -     | -1.52 | -2.88 | -1.89 | C6 | conserved hypothetical protein                                           | Hypothetical proteins: Conserved                                                                                        |
| SACOL0987 | fabH  | -2.19 | -4.48 | -2.04 | C6 | 3-oxoacyl-(acyl-carrier-protein) synthase III                            | Fatty acid and phospholipid metabolism: Biosynthesis                                                                    |
| SACOL0988 | fabF  | -1.53 | -3.31 | -2.16 | C6 | 3-oxoacyl-(acyl-carrier-protein) synthase II                             | Fatty acid and phospholipid metabolism: Biosynthesis                                                                    |
| SACOL1168 | efb   | -1.36 | -4.43 | -3.25 | C6 | fibronin-binding protein                                                 | Cell envelope: Other                                                                                                    |
| SACOL1301 | -     | -1.77 | -3.23 | -1.82 | C6 | transcriptional regulator, putative                                      | Regulatory functions: Other                                                                                             |
| SACOL1302 | pgsA  | -1.72 | -3.66 | -2.13 | C6 | CDP-diacylglycerol-glycerol-3-phosphate 3-phosphatidyltransferase        | Fatty acid and phospholipid metabolism: Biosynthesis                                                                    |
| SACOL1325 | gpxA1 | -1.46 | -2.58 | -1.77 | C6 | glutathione peroxidase                                                   | Biosynthesis of cofactors, prosthetic groups, and carriers: Glutathione and analogs; Cellular processes: Detoxification |

|           |       |       |       |       |    |                                                                      |                                                                                                                                             |
|-----------|-------|-------|-------|-------|----|----------------------------------------------------------------------|---------------------------------------------------------------------------------------------------------------------------------------------|
| SACOL1365 | -     | -1.23 | -2.58 | -2.09 | C6 | hydrolase, haloacid dehalogenase-like family                         | Unknown function: Enzymes of unknown specificity                                                                                            |
| SACOL1377 | tkf   | -1.69 | -2.54 | -1.50 | C6 | transketolase                                                        | Energy metabolism: Pentose phosphate pathway                                                                                                |
| SACOL1439 | -     | -1.58 | -3.16 | -2.01 | C6 | acylphosphatase                                                      | Fatty acid and phospholipid metabolism: Other                                                                                               |
| SACOL1440 | -     | -1.23 | -3.26 | -2.65 | C6 | ypaC protein, putative                                               | Cellular processes: Other                                                                                                                   |
| SACOL1516 | rpsA  | -1.40 | -2.92 | -2.08 | C6 | ribosomal protein S1                                                 | Protein synthesis: Ribosomal proteins: synthesis and modification                                                                           |
| SACOL1520 | -     | -1.82 | -2.94 | -1.62 | C6 | pyridine nucleotide-disulfide oxidoreductase                         | Unknown function: Enzymes of unknown specificity                                                                                            |
| SACOL1554 | gnd   | -1.44 | -2.89 | -2.01 | C6 | 6-phosphogluconate dehydrogenase, decarboxylating                    | Energy metabolism: Pentose phosphate pathway                                                                                                |
| SACOL1562 | -     | -1.43 | -2.62 | -1.83 | C6 | 2-oxoisovalerate dehydrogenase, E1 component, alpha subunit          | Energy metabolism: Amino acids and amines                                                                                                   |
| SACOL1563 | lpdA  | -1.52 | -2.53 | -1.66 | C6 | 2-oxoisovalerate dehydrogenase, E3 component, lipamide dehydrogenase | Energy metabolism: Amino acids and amines                                                                                                   |
| SACOL1566 | ispA  | -1.45 | -2.80 | -1.94 | C6 | geranyltranstransferase                                              | Biosynthesis of cofactors, prosthetic groups, and carriers: Menaquinone and ubiquinone                                                      |
| SACOL1568 | xseA  | -1.45 | -2.85 | -1.97 | C6 | exodeoxyribonuclease VII, large subunit                              | DNA metabolism: Degradation of DNA                                                                                                          |
| SACOL1588 | -     | -1.31 | -3.00 | -2.28 | C6 | proline dipeptidase                                                  | Protein fate: Degradation of proteins, peptides, and glycopeptides                                                                          |
| SACOL1629 | -     | -1.22 | -2.49 | -2.04 | C6 | conserved hypothetical protein                                       | Hypothetical proteins: Conserved                                                                                                            |
| SACOL1630 | -     | -1.58 | -2.55 | -1.62 | C6 | conserved hypothetical protein                                       | Hypothetical proteins: Conserved                                                                                                            |
| SACOL1631 | -     | -1.71 | -2.82 | -1.65 | C6 | conserved hypothetical protein                                       | Hypothetical proteins: Conserved                                                                                                            |
| SACOL1714 | hemL1 | -1.28 | -3.26 | -2.55 | C6 | glutamate-1-semialdehyde-2,1-aminomutase                             | Biosynthesis of cofactors, prosthetic groups, and carriers: Heme, porphyrin, and cobalamin                                                  |
| SACOL1715 | hemB  | -1.49 | -3.19 | -2.14 | C6 | delta-aminolevulinic acid dehydratase                                | Biosynthesis of cofactors, prosthetic groups, and carriers: Heme, porphyrin, and cobalamin                                                  |
| SACOL1716 | hemD  | -1.75 | -3.06 | -1.75 | C6 | uroporphyrinogen-III synthase                                        | Biosynthesis of cofactors, prosthetic groups, and carriers: Heme, porphyrin, and cobalamin                                                  |
| SACOL1782 | fhs   | -1.62 | -5.16 | -3.18 | C6 | formate-tetrahydrofolate ligase                                      | Central intermediary metabolism: One-carbon metabolism                                                                                      |
| SACOL1835 | -     | -1.53 | -2.61 | -1.71 | C6 | oxidoreductase, aldo/keto reductase family                           | Unknown function: Enzymes of unknown specificity                                                                                            |
| SACOL1843 | -     | -1.94 | -4.00 | -2.06 | C6 | o-succinylbenzoic acid (OSB) synthetase, putative                    | Biosynthesis of cofactors, prosthetic groups, and carriers: Menaquinone and ubiquinone                                                      |
| SACOL1892 | -     | -1.43 | -3.36 | -2.35 | C6 | membrane protein, putative                                           | Cell envelope: Other                                                                                                                        |
| SACOL1893 | vraS  | -1.40 | -2.68 | -1.91 | C6 | sensor histidine kinase VraS                                         | Cellular processes: Toxin production and resistance; Regulatory functions: Protein interactions; Signal transduction: Two-component systems |
| SACOL1961 | gatA  | -1.28 | -2.64 | -2.07 | C6 | glutamyl-tRNA(Gln) amidotransferase, A subunit                       | Protein synthesis: tRNA aminoacylation                                                                                                      |
| SACOL1970 | sspB2 | -1.36 | -2.56 | -1.88 | C6 | cysteine protease precursor SspB                                     | Protein fate: Degradation of proteins, peptides, and glycopeptides; Cellular processes: Pathogenesis                                        |
| SACOL2018 | -     | -2.78 | -6.45 | -3.32 | C6 | abortive infection protein family                                    | Unknown function: General                                                                                                                   |
| SACOL2126 | luxS  | -1.42 | -2.82 | -1.99 | C6 | autoinducer-2 production protein LuxS                                | Cellular processes: Other                                                                                                                   |
| SACOL2186 | -     | -1.28 | -2.88 | -2.24 | C6 | galactose-6-phosphate isomerase, LacA subunit                        | Energy metabolism: Biosynthesis and degradation of polysaccharides                                                                          |
| SACOL2241 | -     | -2.84 | -6.72 | -2.37 | C6 | conserved hypothetical protein                                       | Hypothetical proteins: Conserved                                                                                                            |
| SACOL2439 | -     | -2.36 | -4.55 | -1.93 | C6 | lipoprotein, putative                                                | Cell envelope: Other                                                                                                                        |
| SACOL2534 | frp   | -1.74 | -2.98 | -1.71 | C6 | NAD(P)H-flavin oxidoreductase                                        | Energy metabolism: Electron transport                                                                                                       |
| SACOL2535 | -     | -1.71 | -2.72 | -1.59 | C6 | D-isomer specific 2-hydroxyacid dehydrogenase family protein         | Central intermediary metabolism: Other                                                                                                      |
| SACOL2592 | -     | -1.75 | -3.54 | -2.01 | C6 | conserved hypothetical protein                                       | Hypothetical proteins: Conserved                                                                                                            |
| SACOL2593 | -     | -1.81 | -3.30 | -1.82 | C6 | transcriptional regulator, TetR family                               | Regulatory functions: DNA interactions                                                                                                      |
| SACOL2618 | ldh2  | -1.95 | -5.19 | -2.67 | C6 | L-lactate dehydrogenase                                              | Energy metabolism: Anaerobic; Energy metabolism: Glycolysis/gluconeogenesis                                                                 |
| SACOL2688 | icaR  | -3.14 | -8.59 | -2.74 | C6 | intercellular adhesion regulator                                     | Cellular processes: Pathogenesis; Regulatory functions: DNA interactions                                                                    |
| SACOL2731 | -     | -2.58 | -5.59 | -2.17 | C6 | cold shock protein, CSD family                                       | Cellular processes: Adaptations to atypical conditions                                                                                      |
| SACOL0170 | rocD1 | -1.48 | 2.42  | 3.57  | C7 | ornithine aminotransferase                                           | Energy metabolism: Amino acids and amines                                                                                                   |
| SACOL0430 | -     | -1.57 | 1.61  | 2.53  | C7 | trans-sulfuration enzyme family protein                              | Amino acid biosynthesis: Aspartate family                                                                                                   |
| SACOL0494 | nuoF  | -2.82 | -1.33 | 2.12  | C7 | NADH dehydrogenase I, F subunit                                      | Energy metabolism: Electron transport                                                                                                       |
| SACOL0501 | -     | -8.34 | -2.18 | 3.83  | C7 | sodium-dependent transporter, putative                               | Transport and binding proteins: Unknown substrate; Transport and binding proteins: Cations and iron carrying compounds                      |
| SACOL0502 | -     | -2.26 | 2.98  | 6.74  | C7 | cysteine synthase/cystathionine beta-synthase family protein         | Amino acid biosynthesis: Serine family                                                                                                      |
| SACOL0506 | -     | -1.25 | 2.28  | 2.85  | C7 | ABC transporter, substrate-binding protein                           | Transport and binding proteins: Unknown substrate                                                                                           |
| SACOL0516 | -     | -2.04 | 1.38  | 2.83  | C7 | PTS system, IIBC components                                          | Transport and binding proteins: Carbohydrates, organic alcohols, and acids; Signal transduction: PTS                                        |
| SACOL0621 | -     | -1.76 | 1.74  | 3.06  | C7 | substrate-CoA ligase, putative                                       | Fatty acid and phospholipid metabolism: Other                                                                                               |
| SACOL0652 | -     | -2.55 | -1.25 | 2.05  | C7 | conserved hypothetical protein                                       | Hypothetical proteins: Conserved                                                                                                            |
| SACOL0725 | -     | -2.57 | 1.26  | 3.23  | C7 | transcriptional regulator, AraC family                               | Regulatory functions: DNA interactions                                                                                                      |
| SACOL0769 | -     | -1.84 | 1.61  | 2.95  | C7 | conserved hypothetical protein                                       | Hypothetical proteins: Conserved                                                                                                            |
| SACOL1044 | -     | -2.54 | -1.44 | 1.77  | C7 | conserved hypothetical protein                                       | Hypothetical proteins: Conserved                                                                                                            |
| SACOL1141 | isdC  | -2.99 | -1.45 | 2.06  | C7 | NPQTN cell wall surface anchor protein                               | Cell envelope: Other                                                                                                                        |
| SACOL1269 | xerC  | -2.24 | 1.18  | 2.64  | C7 | tyrosine recombinase XerC                                            | DNA metabolism: DNA replication, recombination, and repair                                                                                  |
| SACOL1675 | -     | -2.73 | -1.58 | 1.73  | C7 | TPR domain protein                                                   | Unknown function: General                                                                                                                   |
| SACOL1687 | -     | -2.68 | -1.52 | 1.76  | C7 | N-acetylmuramoyl-L-alanine amidase, family 3                         | Cell envelope: Biosynthesis and degradation of surface polysaccharides and lipopolysaccharides                                              |
| SACOL1832 | crbB  | -2.50 | -1.32 | 1.89  | C7 | crbB protein                                                         | Unknown function: General                                                                                                                   |
| SACOL1904 | -     | -1.48 | 1.79  | 2.65  | C7 | transcriptional regulator, putative                                  | Regulatory functions: Other                                                                                                                 |
| SACOL2086 | -     | -2.77 | 1.37  | 3.81  | C7 | transcriptional regulator, TenA family                               | Regulatory functions: Other                                                                                                                 |
| SACOL2157 | -     | -1.35 | 1.87  | 2.52  | C7 | drug resistance transporter, EmrB/QacA subfamily                     | Cellular processes: Toxin production and resistance; Transport and binding proteins: Other                                                  |
| SACOL2158 | -     | -2.37 | 1.15  | 2.74  | C7 | conserved hypothetical protein                                       | Hypothetical proteins: Conserved                                                                                                            |
| SACOL2159 | -     | -1.48 | 1.92  | 2.83  | C7 | drug transporter, putative                                           | Cellular processes: Toxin production and resistance; Transport and binding proteins: Other                                                  |
| SACOL2163 | -     | -2.90 | -1.39 | 2.09  | C7 | conserved hypothetical protein                                       | Hypothetical proteins: Conserved                                                                                                            |
| SACOL2440 | -     | -2.73 | -1.56 | 1.75  | C7 | conserved hypothetical protein                                       | Hypothetical proteins: Conserved                                                                                                            |
| SACOL2463 | pepA2 | -1.39 | 3.00  | 4.17  | C7 | glutamyl-aminopeptidase                                              | Protein fate: Degradation of proteins, peptides, and glycopeptides                                                                          |
| SACOL2509 | fnbB  | -2.01 | 2.90  | 5.83  | C7 | fibronectin binding protein B                                        | Cell envelope: Other                                                                                                                        |
| SACOL2689 | icaA  | -1.42 | 2.53  | 3.60  | C7 | intercellular adhesion protein A                                     | Cell envelope: Biosynthesis and degradation of surface polysaccharides and lipopolysaccharides                                              |
| SACOL2690 | icaD  | -1.47 | 2.14  | 3.13  | C7 | intercellular adhesion protein D                                     | Cell envelope: Biosynthesis and degradation of surface polysaccharides and lipopolysaccharides                                              |
| SACOL0018 | purA  | 1.87  | -2.17 | -4.06 | C8 | adenylosuccinate synthetase                                          | Purines, pyrimidines, nucleosides, and nucleotides: Purine ribonucleotide biosynthesis                                                      |
| SACOL0226 | -     | -1.15 | -3.07 | -2.67 | C8 | conserved hypothetical protein                                       | Hypothetical proteins: Conserved                                                                                                            |
| SACOL0331 | mecA  | 1.26  | -1.98 | -2.49 | C8 | penicillin-binding protein 2                                         | Cell envelope: Biosynthesis and degradation of murein sacculus and peptidoglycan                                                            |
| SACOL0335 | -     | 1.77  | -1.88 | -3.33 | C8 | hypothetical protein                                                 | -                                                                                                                                           |
| SACOL0992 | -     | 1.61  | -2.20 | -3.55 | C8 | conserved hypothetical protein                                       | Hypothetical proteins: Conserved                                                                                                            |
| SACOL0995 | spa   | 1.10  | -5.78 | -6.35 | C8 | immunoglobulin G binding protein A precursor                         | Cellular processes: Pathogenesis                                                                                                            |
| SACOL0111 | -     | -1.14 | -2.57 | -2.25 | C8 | acetoin reductase                                                    | Energy metabolism: Fermentation                                                                                                             |
| SACOL0119 | sasD  | 1.25  | -2.24 | -2.81 | C8 | cell wall surface anchor family protein                              | Cell envelope: Other                                                                                                                        |
| SACOL0276 | yukA  | 1.02  | -2.43 | -2.48 | C8 | diarrheal toxin                                                      | Unknown function: General                                                                                                                   |
| SACOL0300 | -     | -1.06 | -2.93 | -2.75 | C8 | hypothetical protein                                                 | -                                                                                                                                           |
| SACOL0565 | -     | -1.18 | -2.86 | -2.43 | C8 | conserved hypothetical protein                                       | Hypothetical proteins: Conserved                                                                                                            |
| SACOL0617 | -     | 1.02  | -2.67 | -2.72 | C8 | hexulose-6-phosphate synthase, putative                              | Energy metabolism: Sugars                                                                                                                   |
| SACOL0618 | -     | 1.20  | -2.20 | -2.64 | C8 | SIS domain protein                                                   | Unknown function: General                                                                                                                   |
| SACOL0635 | -     | 1.64  | -1.64 | -2.69 | C8 | lipotein-protein ligase A family protein                             | Protein fate: Protein modification and repair                                                                                               |
| SACOL0763 | -     | 2.08  | -2.74 | -5.70 | C8 | oxidoreductase, aldo/keto reductase family                           | Unknown function: Enzymes of unknown specificity                                                                                            |
| SACOL0777 | -     | 1.11  | -2.39 | -2.66 | C8 | urea amidolyase-related protein                                      | Unknown function: General                                                                                                                   |
| SACOL0778 | -     | 1.64  | -1.51 | -2.48 | C8 | sulfatase family protein                                             | Unknown function: Enzymes of unknown specificity                                                                                            |
| SACOL0783 | opuBB | 1.26  | -2.06 | -2.59 | C8 | osmoprotectant ABC transporter, permease protein                     | Transport and binding proteins: Amino acids, peptides and amines                                                                            |
| SACOL0957 | -     | 1.61  | -2.32 | -3.74 | C8 | peptidyl-prolyl cis-trans isomerase, cyclophilin-type                | Protein fate: Protein folding and stabilization                                                                                             |
| SACOL0985 | -     | 1.42  | -2.57 | -3.65 | C8 | surface protein, putative                                            | Cell envelope: Other                                                                                                                        |
| SACOL1123 | pyc   | 1.13  | -2.24 | -2.53 | C8 | pyruvate carboxylase                                                 | Energy metabolism: Glycolysis/gluconeogenesis                                                                                               |

|           |      |             |              |              |           |   |                                                          |                                                                                                                                                               |
|-----------|------|-------------|--------------|--------------|-----------|---|----------------------------------------------------------|---------------------------------------------------------------------------------------------------------------------------------------------------------------|
| SACOL1164 | -    | 1.91        | <b>-3.35</b> | <b>-6.40</b> | <b>C8</b> |   | fibrinogen binding-related protein                       | Unknown function: General                                                                                                                                     |
| SACOL1169 | -    | -1.14       | <b>-4.32</b> | <b>-3.80</b> | <b>C8</b> |   | fibrinogen-binding protein precursor-related protein     | Unknown function: General                                                                                                                                     |
| SACOL1317 | gfpP | -1.07       | <b>-2.61</b> | <b>-2.44</b> | <b>C8</b> |   | glycerol uptake operon antiterminator regulatory protein | Regulatory functions: RNA interactions                                                                                                                        |
| SACOL1329 | femC | -1.05       | <b>-3.56</b> | <b>-3.38</b> | <b>C8</b> |   | glutamine synthetase FemC                                | Cell envelope: Biosynthesis and degradation of murein sacculus and peptidoglycan                                                                              |
| SACOL1351 | cls1 | -1.05       | <b>-2.58</b> | <b>-2.45</b> | <b>C8</b> |   | cardiolipin synthetase                                   | Fatty acid and phospholipid metabolism: Biosynthesis                                                                                                          |
| SACOL1441 | -    | 1.16        | <b>-3.30</b> | <b>-3.81</b> | <b>C8</b> |   | tellurite resistance protein, putative                   | Cellular processes: Toxin production and resistance                                                                                                           |
| SACOL1456 | -    | <b>1.86</b> | <b>-2.14</b> | <b>-3.97</b> | <b>C8</b> |   | conserved hypothetical protein                           | Hypothetical proteins: Conserved                                                                                                                              |
| SACOL1457 | -    | <b>1.66</b> | <b>-2.83</b> | <b>-4.70</b> | <b>C8</b> |   | PTS system, IIA component                                | Transport and binding proteins: Carbohydrates, organic alcohols, and acids; Signal transduction: PTS                                                          |
| SACOL1623 | -    | 1.20        | <b>-2.45</b> | <b>-2.95</b> | <b>C8</b> |   | DNA repair protein RecO family                           | DNA metabolism: DNA replication, recombination, and repair                                                                                                    |
| SACOL1670 | -    | <b>1.67</b> | <b>-1.55</b> | <b>-2.60</b> | <b>C8</b> |   | conserved hypothetical protein                           | Hypothetical proteins: Conserved                                                                                                                              |
| SACOL1753 | -    | 1.22        | <b>-2.81</b> | <b>-3.42</b> | <b>C8</b> |   | universal stress protein family                          | Cellular processes: Adaptations to atypical conditions                                                                                                        |
| SACOL1759 | -    | -1.11       | <b>-3.64</b> | <b>-3.28</b> | <b>C8</b> |   | universal stress protein family                          | Cellular processes: Adaptations to atypical conditions                                                                                                        |
| SACOL1760 | ackA | 1.14        | <b>-3.37</b> | <b>-3.83</b> | <b>C8</b> | ↓ | acetate kinase                                           | Central intermediary metabolism: Other; Energy metabolism: Fermentation                                                                                       |
| SACOL1796 | -    | <b>1.70</b> | <b>-1.89</b> | <b>-3.21</b> | <b>C8</b> |   | conserved hypothetical protein                           | Hypothetical proteins: Conserved                                                                                                                              |
| SACOL1831 | tal  | -1.18       | <b>-5.26</b> | <b>-4.46</b> | <b>C8</b> |   | transaldolase                                            | Energy metabolism: Pentose phosphate pathway                                                                                                                  |
| SACOL1942 | vraR | -1.16       | <b>-2.69</b> | <b>-2.31</b> | <b>C8</b> |   | DNA-binding response regulator VraR                      | Cellular processes: Toxin production and resistance; Regulatory functions: DNA interactions; Regulatory functions; Signal transduction: Two-component systems |
| SACOL1960 | gatB | 1.03        | <b>-2.44</b> | <b>-2.50</b> | <b>C8</b> |   | glutamyl-tRNA(Gln) amidotransferase, B subunit           | Protein synthesis: tRNA aminoacylation                                                                                                                        |
| SACOL1964 | camS | -1.03       | <b>-2.60</b> | <b>-2.53</b> | <b>C8</b> |   | Staphylococcus aureus sex pheromone                      | Cellular processes: Other; Cellular processes: Cell adhesion                                                                                                  |
| SACOL1965 | lga  | -1.01       | <b>-2.57</b> | <b>-2.54</b> | <b>C8</b> |   | DNA ligase, NAD-dependent                                | DNA metabolism: DNA replication, recombination, and repair                                                                                                    |
| SACOL1966 | pcrA | 1.04        | <b>-2.38</b> | <b>-2.49</b> | <b>C8</b> |   | ATP-dependent DNA helicase PcrA                          | DNA metabolism: DNA replication, recombination, and repair                                                                                                    |
| SACOL1968 | -    | 1.05        | <b>-3.20</b> | <b>-3.34</b> | <b>C8</b> |   | conserved hypothetical protein                           | Hypothetical proteins: Conserved                                                                                                                              |
| SACOL1969 | purB | 1.24        | <b>-2.94</b> | <b>-3.65</b> | <b>C8</b> |   | adenylosuccinate lyase                                   | Purines, pyrimidines, nucleosides, and nucleotides: Purine ribonucleotide biosynthesis                                                                        |
| SACOL2006 | -    | <b>1.61</b> | <b>-1.64</b> | <b>-2.64</b> | <b>C8</b> |   | Aerolysin/Leukocidin family protein                      | Cellular processes: Toxin production and resistance; Cellular processes: Pathogenesis                                                                         |
| SACOL2006 | -    | <b>1.61</b> | <b>-1.64</b> | <b>-2.64</b> | <b>C8</b> |   | Aerolysin/Leukocidin family protein                      | Cellular processes: Toxin production and resistance; Cellular processes: Pathogenesis                                                                         |
| SACOL2117 | fbaA | -1.21       | <b>-4.13</b> | <b>-3.41</b> | <b>C8</b> | ↓ | fructose-bisphosphate aldolase, class II                 | Energy metabolism: Glycolysis/gluconeogenesis                                                                                                                 |
| SACOL2192 | -    | 1.07        | <b>-3.06</b> | <b>-3.28</b> | <b>C8</b> |   | oxidoreductase, aldo/keto reductase family               | Unknown function: Enzymes of unknown specificity                                                                                                              |
| SACOL2415 | gpm  | 1.19        | <b>-2.53</b> | <b>-3.01</b> | <b>C8</b> | ↑ | phosphoglycerate mutase                                  | Energy metabolism: Glycolysis/gluconeogenesis                                                                                                                 |
| SACOL2418 | -    | -1.13       | <b>-4.54</b> | <b>-4.03</b> | <b>C8</b> |   | IgG-binding protein SBI                                  | Cellular processes: Pathogenesis                                                                                                                              |
| SACOL2467 | -    | <b>1.74</b> | <b>-1.74</b> | <b>-3.02</b> | <b>C8</b> | ↓ | lipoprotein, putative                                    | Cell envelope: Other                                                                                                                                          |
| SACOL2576 | crtN | 1.67        | <b>-1.58</b> | <b>-2.65</b> | <b>C8</b> | ↑ | dehydroqualene desaturase                                | Central intermediary metabolism: Other                                                                                                                        |
| SACOL2622 | fdaB | -1.09       | <b>-8.52</b> | <b>-7.83</b> | <b>C8</b> | ↑ | fructose-bisphosphate aldolase, class I                  | Energy metabolism: Glycolysis/gluconeogenesis                                                                                                                 |
| SACOL2667 | -    | 1.17        | <b>-2.39</b> | <b>-2.81</b> | <b>C8</b> | ↑ | isochorismatase family protein                           | Unknown function: Enzymes of unknown specificity                                                                                                              |

1) Fold change: genes that passed the significance test (see materials and methods section) are shown in bold. Red: at least 2.5 fold up-regulation. Green: at least -2.5 fold down regulation.

2) Genes grouped based on expression kinetics. **C1**: up-regulated at 10 min and down regulated at 40 min; **C2**: unchanged at 10 min and up-regulated at 40 min; **C3**: up-regulated at 10 min and further up-regulated at 40 min; **C4**:

up-regulated at 10 min and remains up-regulated at a similar level at 40 min; **C5**: down-regulated at 10 min and remains down-regulated at a similar level at 40 min;

regulated at 10 min and up-regulated at 40 min; **C8**: unchanged at 10 min and down-regulated at 40 min

3) Genes positively regulated by SigB as identified by Bischoff et al. 2004 and Pané-Farré et al. 2006 (overlap between both studies). Genes organized in transcription units that are transcribed from an experimentally confirmed SigB-dependent promoter are shaded gray (Bischoff et al. 2004, Pané-Farré et al. 2006, Homerova et al. 2004).

4) Upward and downward arrows show genes induced or repressed in response to linoleic acid based on Kenny et al. 2009.

**Bischoff, M., P. Dunman, J. Kormanec, D. Macapagal, E. Murphy, W. Mounts, B. Berger-Bächi, and S. Projan.** 2004. Microarray-based analysis of the Staphylococcus aureus sigmaB regulon. J. Bacteriol. 186:4085-4099.

**Homerova, D., M. Bischoff, A. Dumolin, and J. Kormanec.** 2004. Optimization of a two-plasmid system for the identification of promoters recognized by RNA polymerase containing Staphylococcus aureus alternative sigma factor sigmaB. FEMS Microbiol. Lett. 232:173-9.

**Kenny, J. G., D. Ward, E. Josefsson, I. M. Jonsson, J. Hinds, H. H. Rees, J. A. Lindsay, A. Tarkowski, and M. J. Horsburgh.** 2009. The Staphylococcus aureus response to unsaturated long chain free fatty acids: survival mechanisms and virulence implications. PLoS One 4:e4344.

**Pané-Farré, J., B. Jonas, K. Forstner, S. Engelmann, and M. Hecker.** 2006. The sigmaB regulon in Staphylococcus aureus and its regulation. Int. J. Med. Microbiol. 296:237-258.

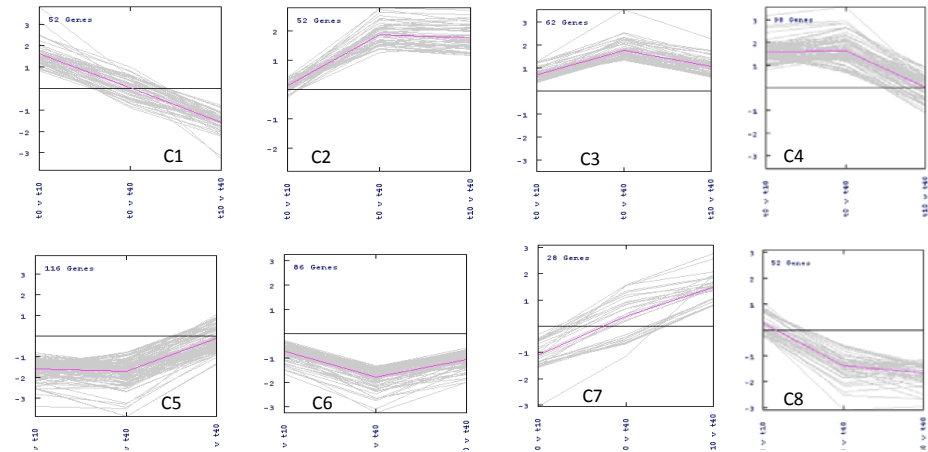

Supplement: pone.0034037.s001.pdf [file pone.0034037.s001.pdf]
